# Supplementary material for: Discovery of Novel Thiophene/Hydrazones: In Vitro and In Silico Studies against Pancreatic Cancer
Source: MDPI journal article supplement (doi:10.3390/pharmaceutics15051441), 2023-05-09
Supplement: s1 [file s1]

## SUPPLEMENTARY MATERIAL

### Discovery of Novel Thiophene/Hydrazones: *In vitro* and *In silico* Studies against pancreatic cancer

Goknil Pelin Coskun<sup>a</sup>, Rengin Reis<sup>b</sup>, Vladimir Dobričić<sup>c</sup>, Jelena Bošković<sup>c</sup>, Yagmur Ozhan<sup>d</sup>,  
Hande Sipahi<sup>d</sup>, Zafer Sahin<sup>e</sup>, Seref Demirayak<sup>f</sup>

<sup>a</sup>Acibadem Mehmet Ali Aydinlar University, Faculty of Pharmacy, Department of Pharmaceutical Chemistry, Istanbul, Turkey

<sup>b</sup>Acibadem Mehmet Ali Aydinlar University, Faculty of Pharmacy, Department of Pharmaceutical Toxicology, Istanbul, Turkey

<sup>c</sup> University of Belgrade-Faculty of Pharmacy, Department of Pharmaceutical Chemistry, Belgrade, Serbia

<sup>d</sup> Yeditepe University, Faculty of Pharmacy, Department of Pharmaceutical Toxicology, Istanbul, Turkey

<sup>e</sup>University of Health Sciences, Hamidiye Faculty of Pharmacy, Department of Pharmaceutical Chemistry, Istanbul, Turkey

<sup>f</sup>Kocaeli Health and Technology University, Faculty of Pharmacy, Department of Pharmaceutical Chemistry, Kocaeli, Turkey

\*Corresponding author: GP Coskun (pelin.coskun@acibadem.edu.tr)

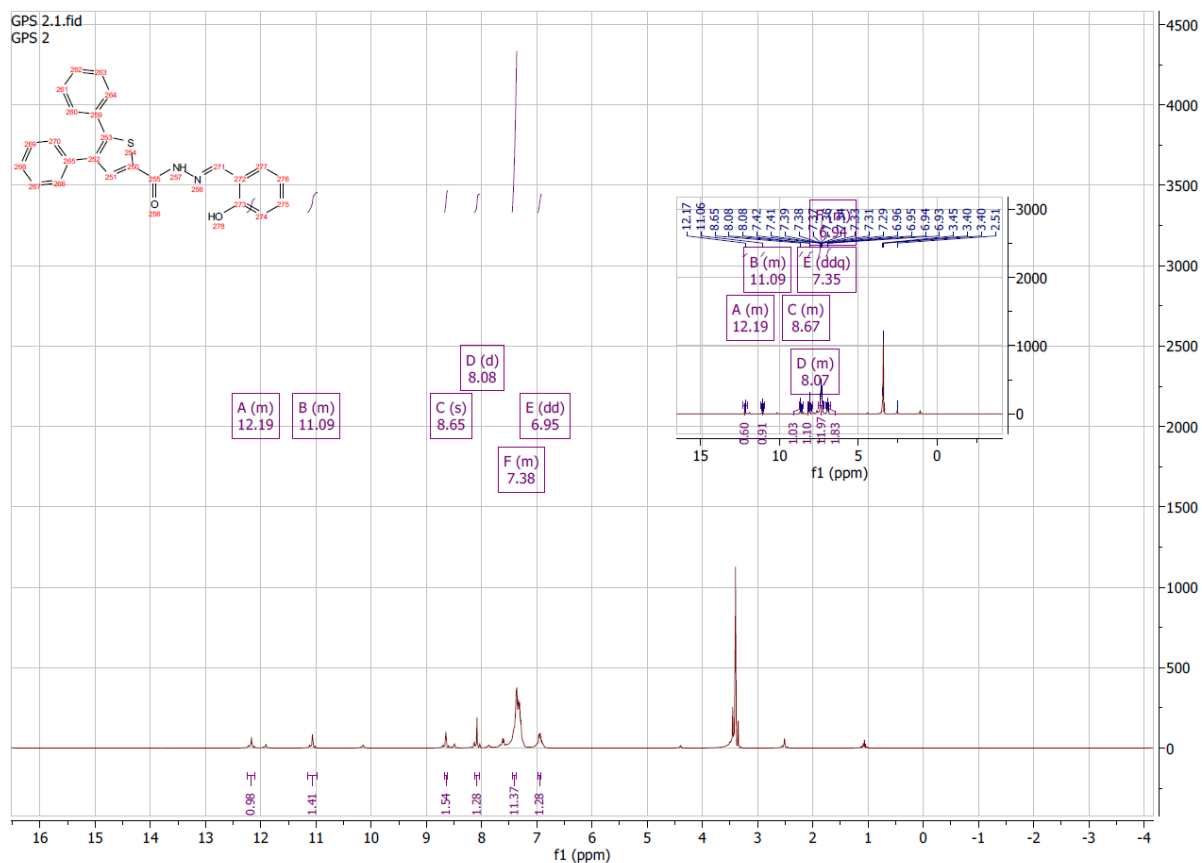

Figure S.1.  $^1\text{H}$ -NMR spectrum of compound 7a

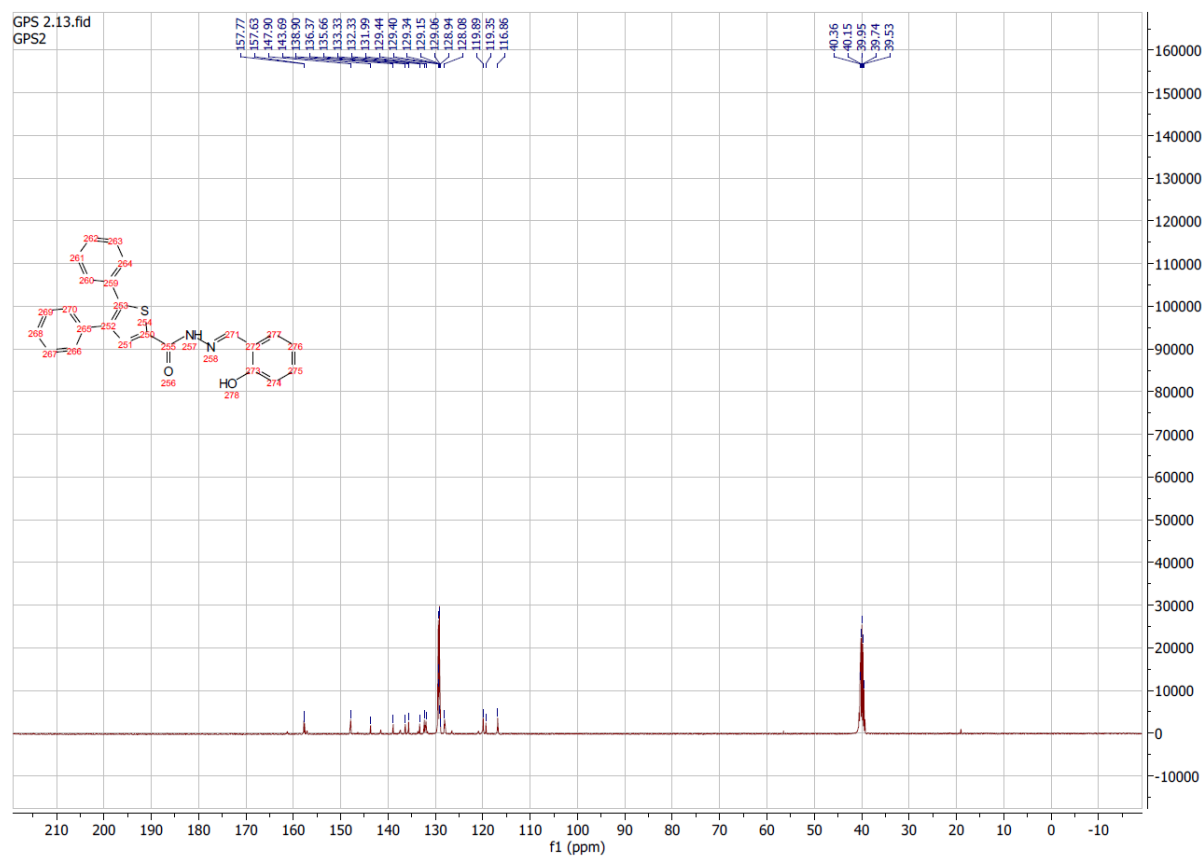

Figure S.2.  $^{13}\text{C}$ -NMR spectrum of compound 7a

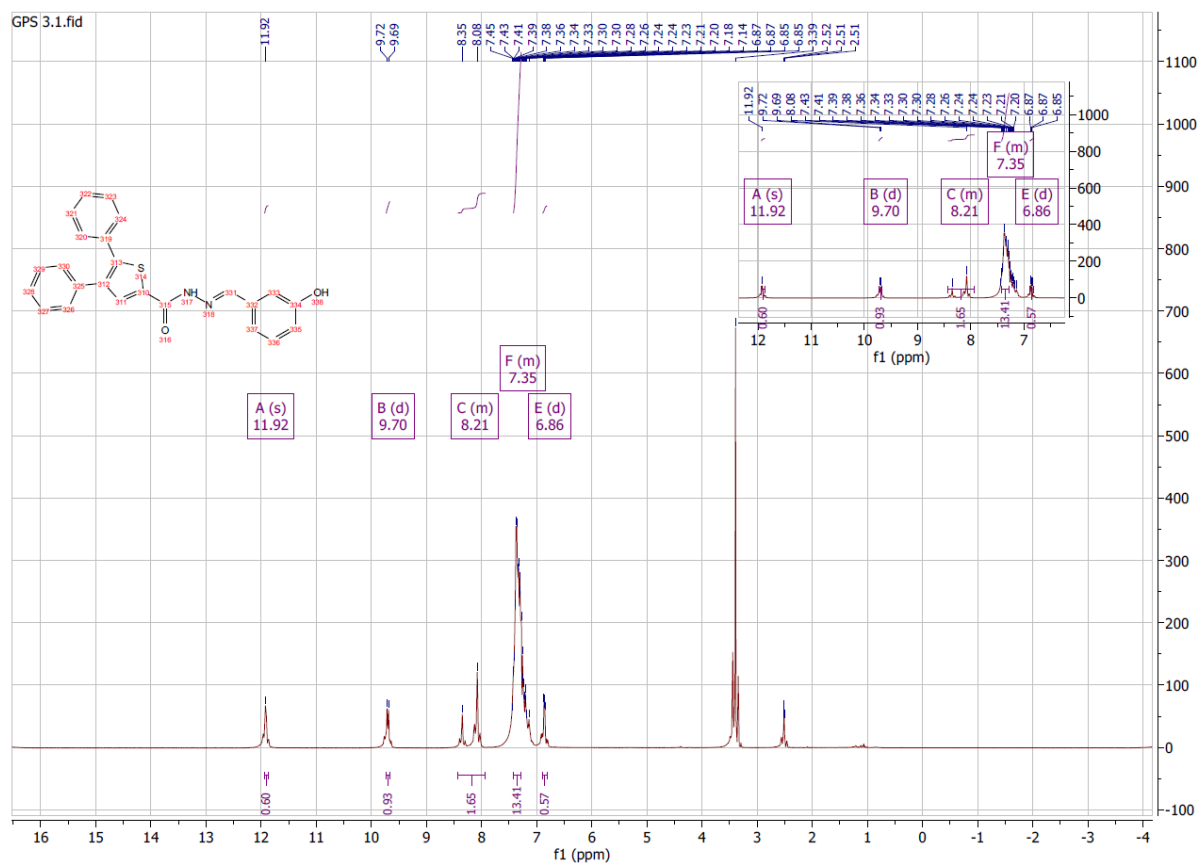

Figure S.3.  $^1\text{H}$ -NMR spectrum of compound 7b

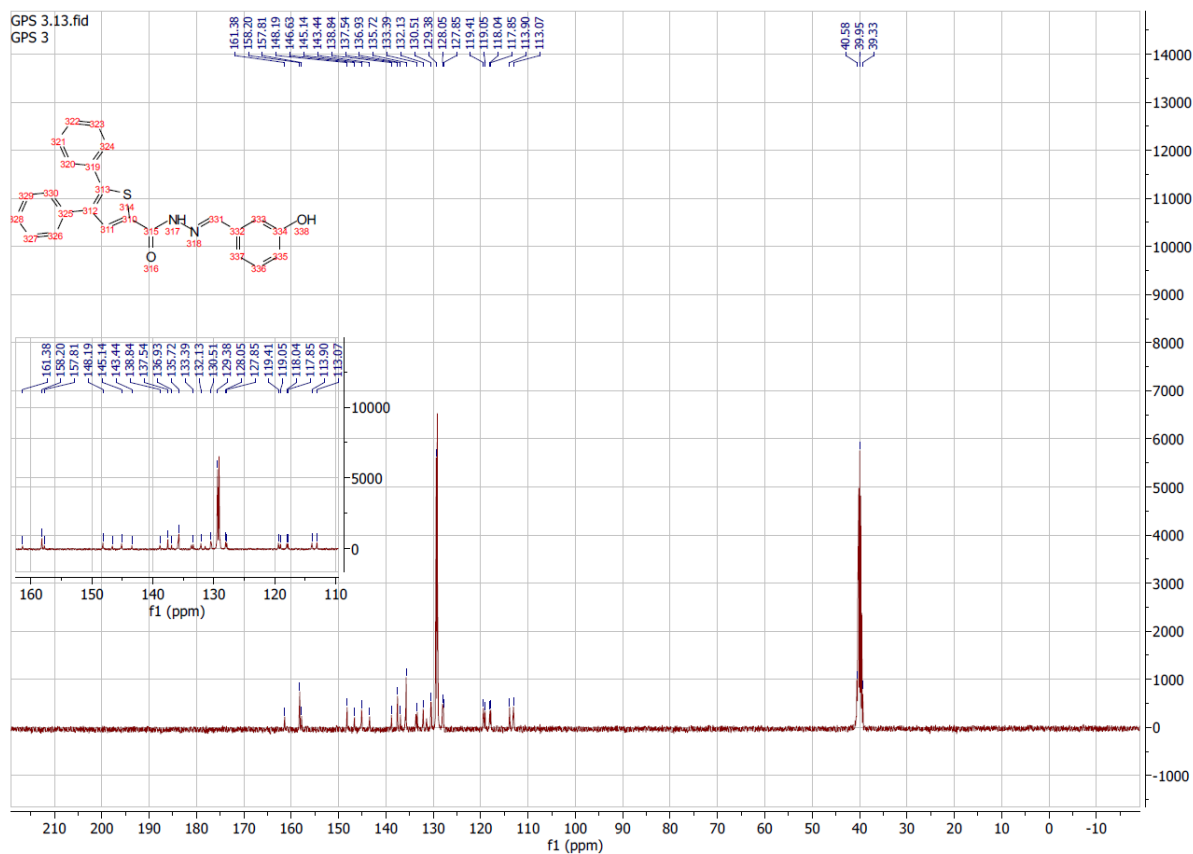

Figure S.4.  $^{13}\text{C}$ -NMR spectrum of compound 7b

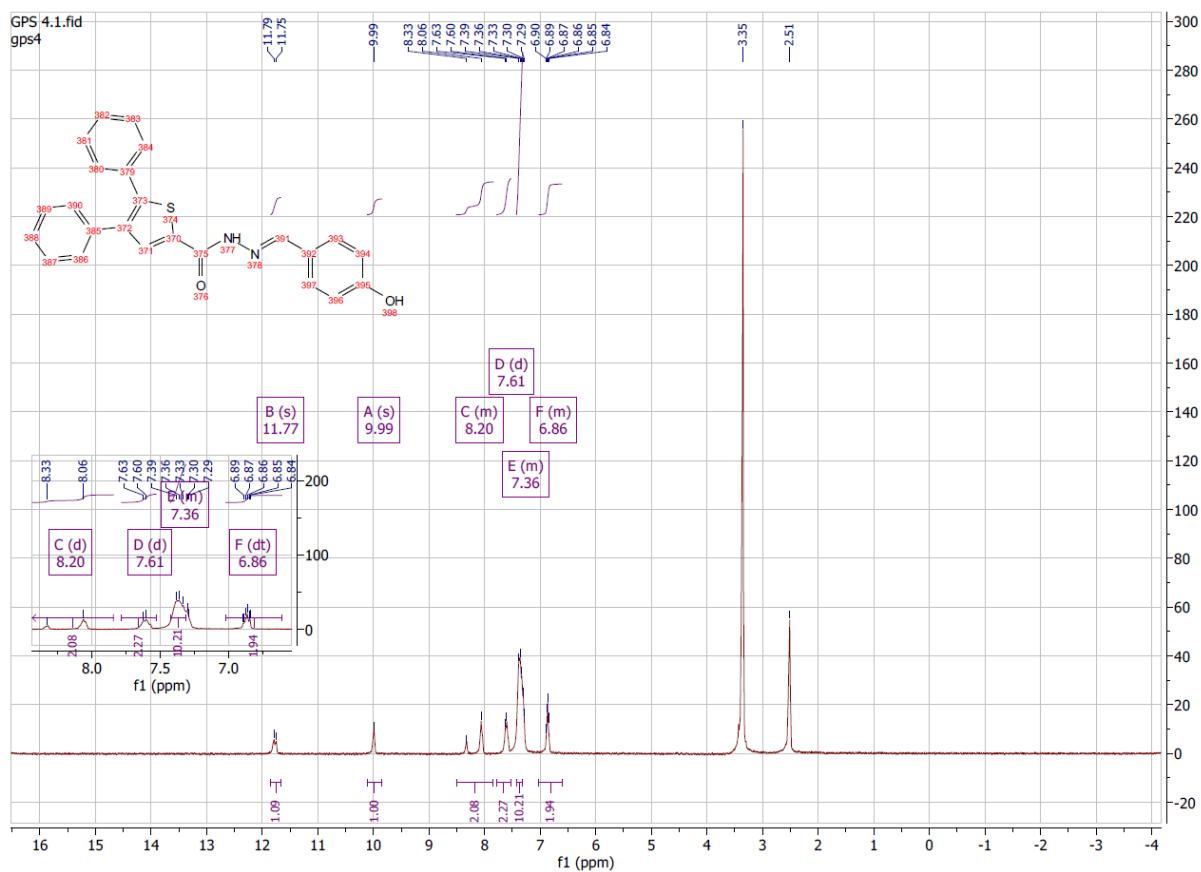

Figure S.5.  $^1\text{H}$ -NMR spectrum of compound 7c

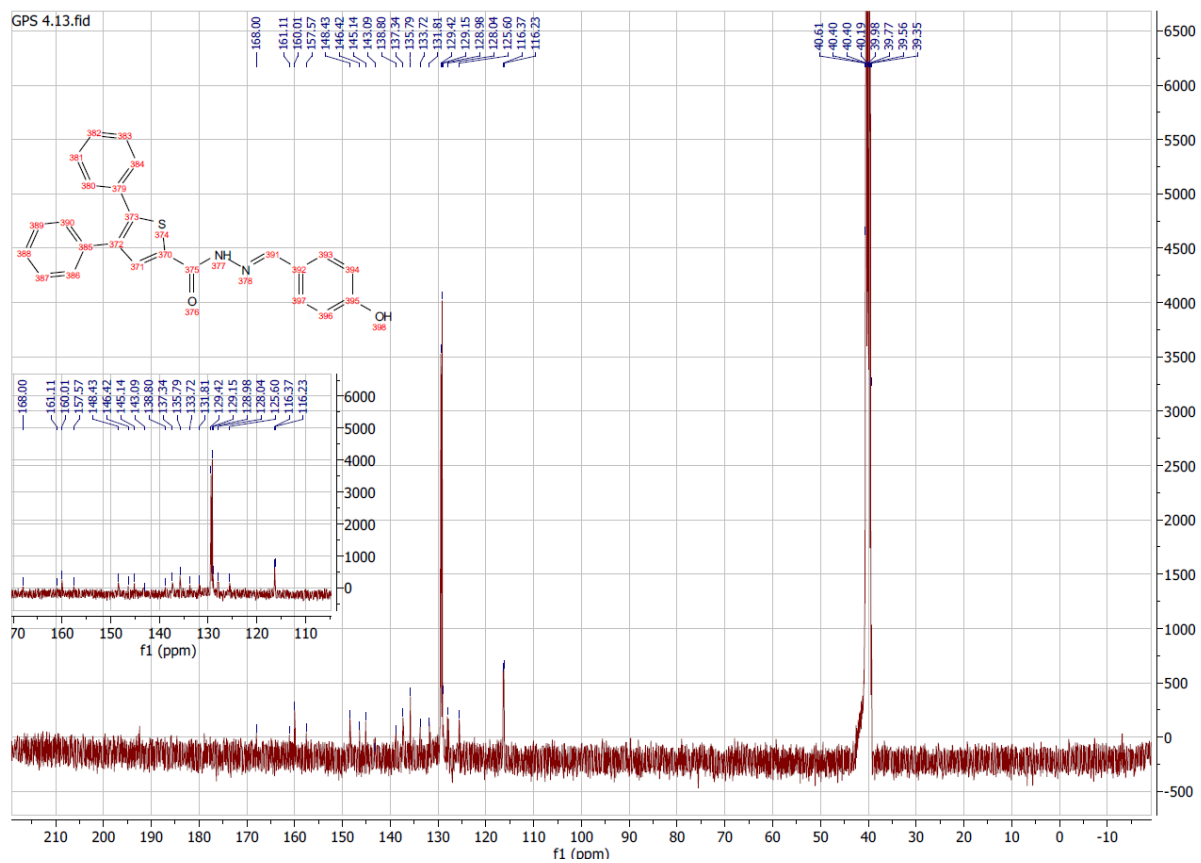

Figure S.6.  $^{13}\text{C}$ -NMR spectrum of compound 7c

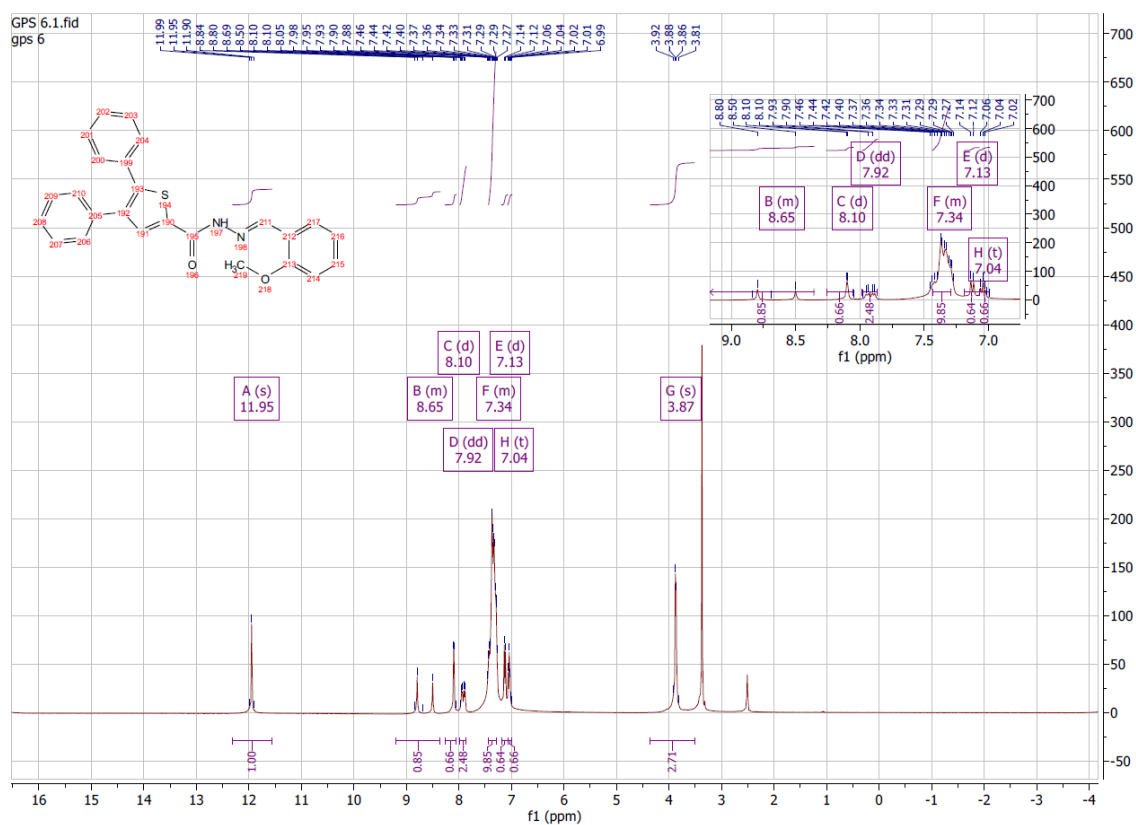

Figure S.7.  $^1\text{H}$ -NMR spectrum of compound 7d

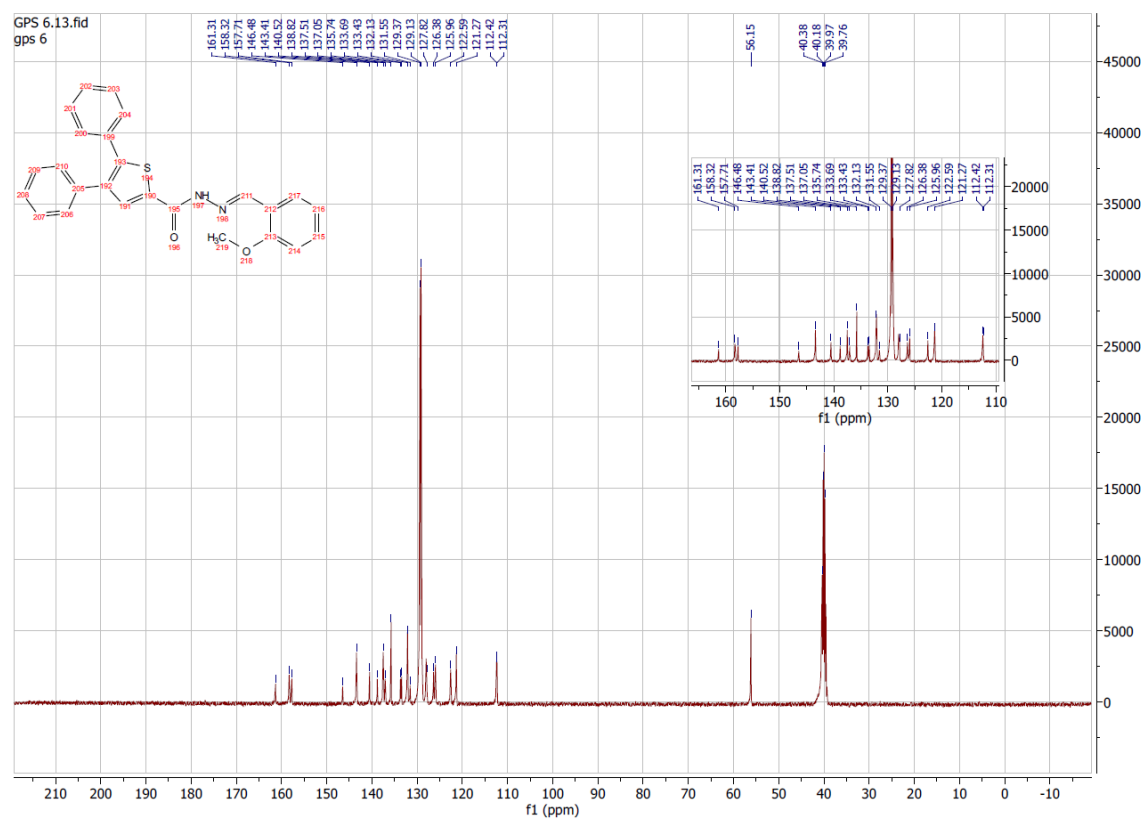

Figure S.8.  $^{13}\text{C}$ -NMR spectrum of compound 7d

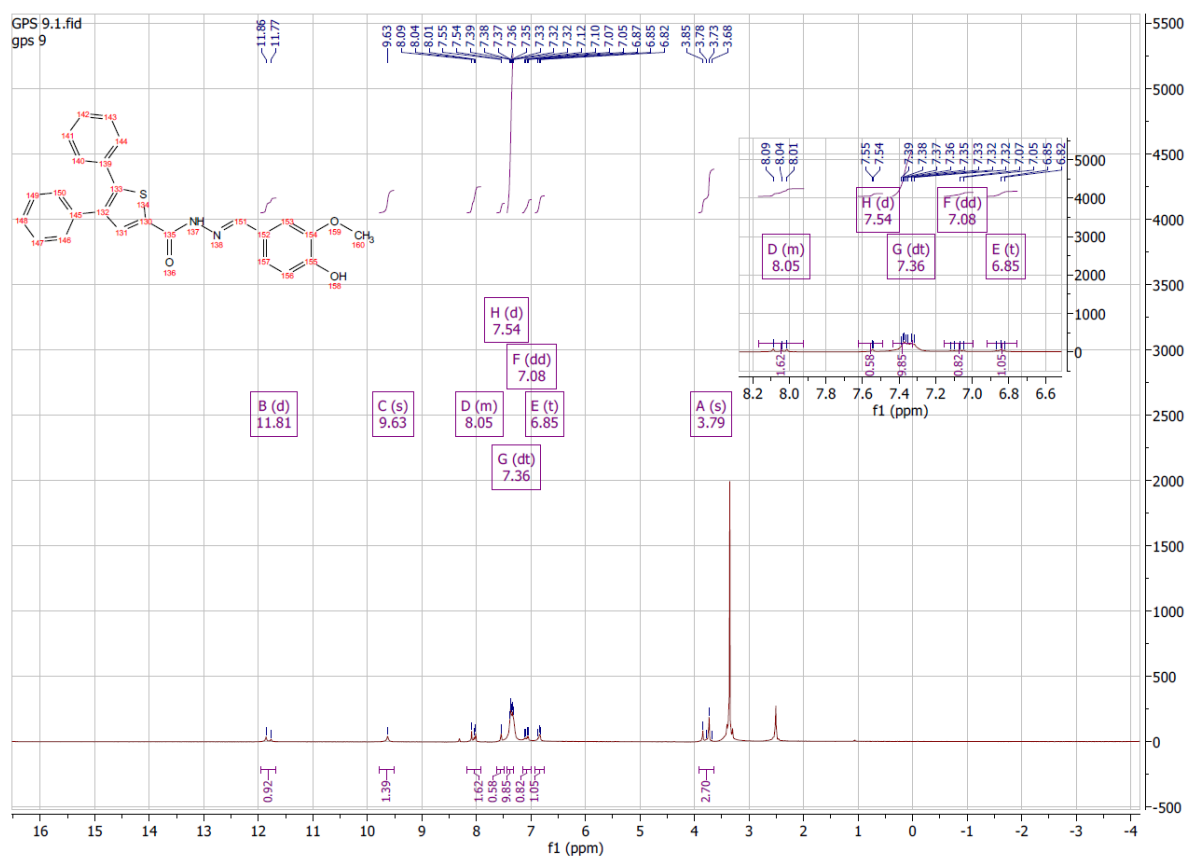

Figure S.9.  $^1\text{H}$ -NMR spectrum of compound 7e

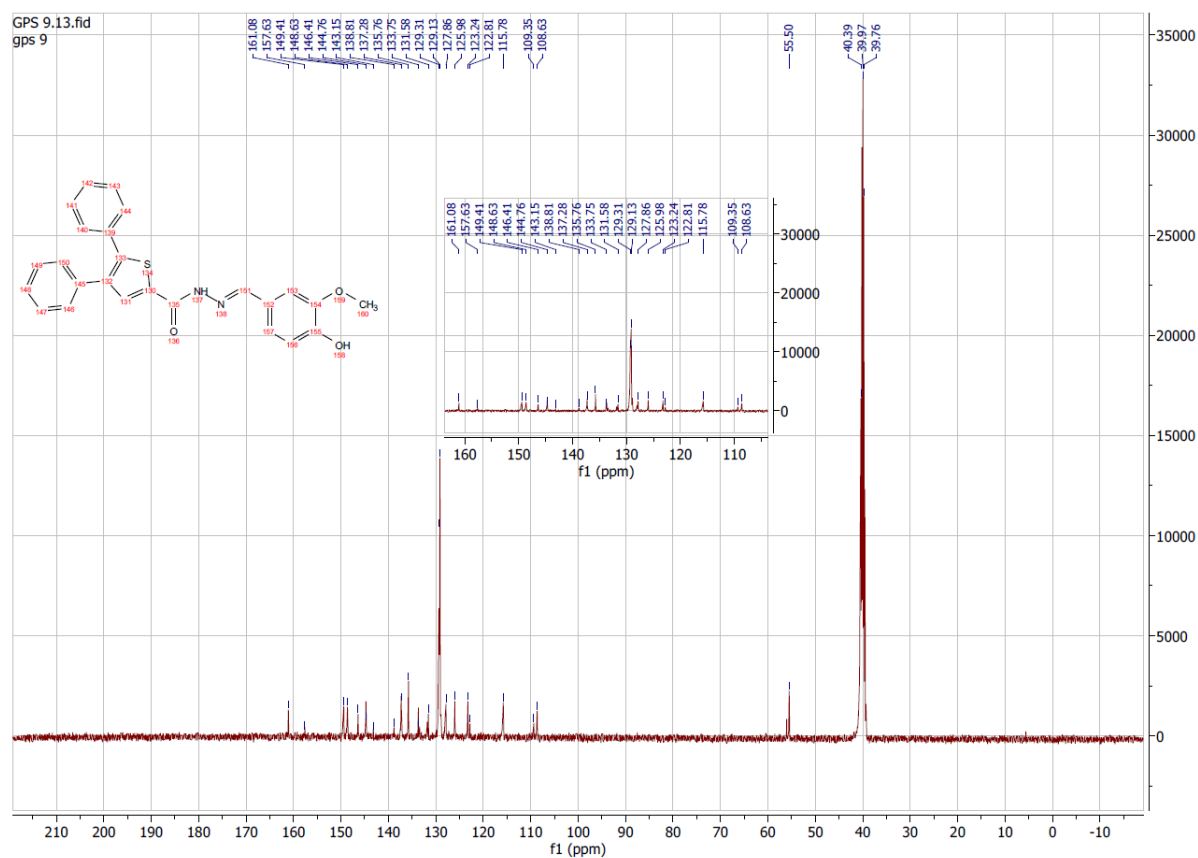

Figure S.10.  $^{13}\text{C}$ -NMR spectrum of compound 7e

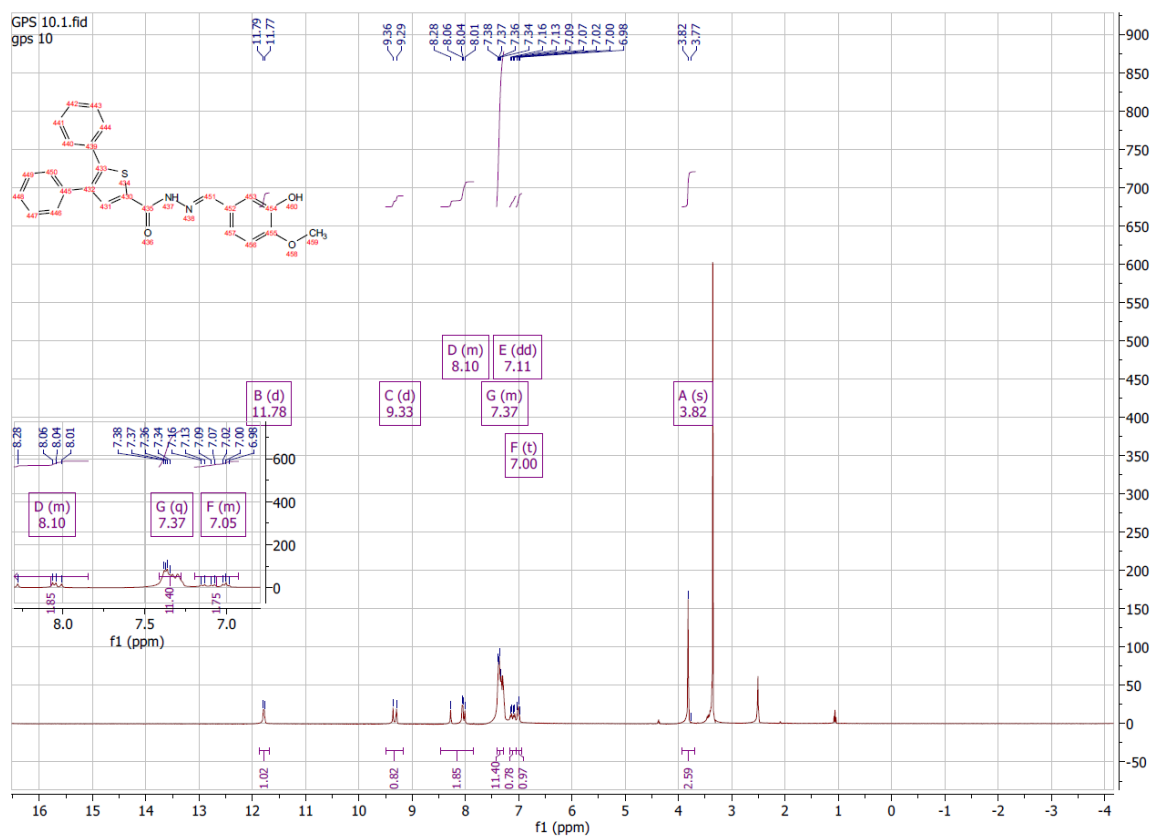

Figure S.11.  $^1\text{H}$ -NMR spectrum of compound 7f

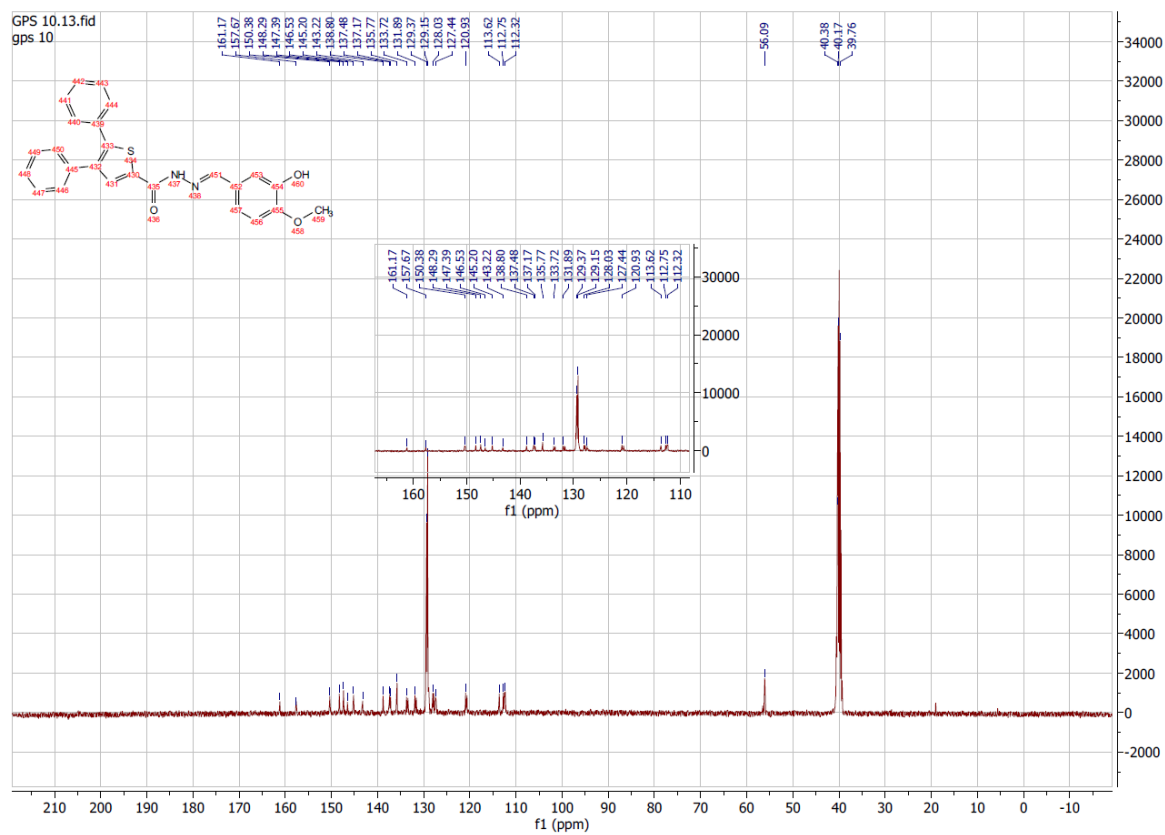

Figure S.12.  $^{13}\text{C}$ -NMR spectrum of compound 7f

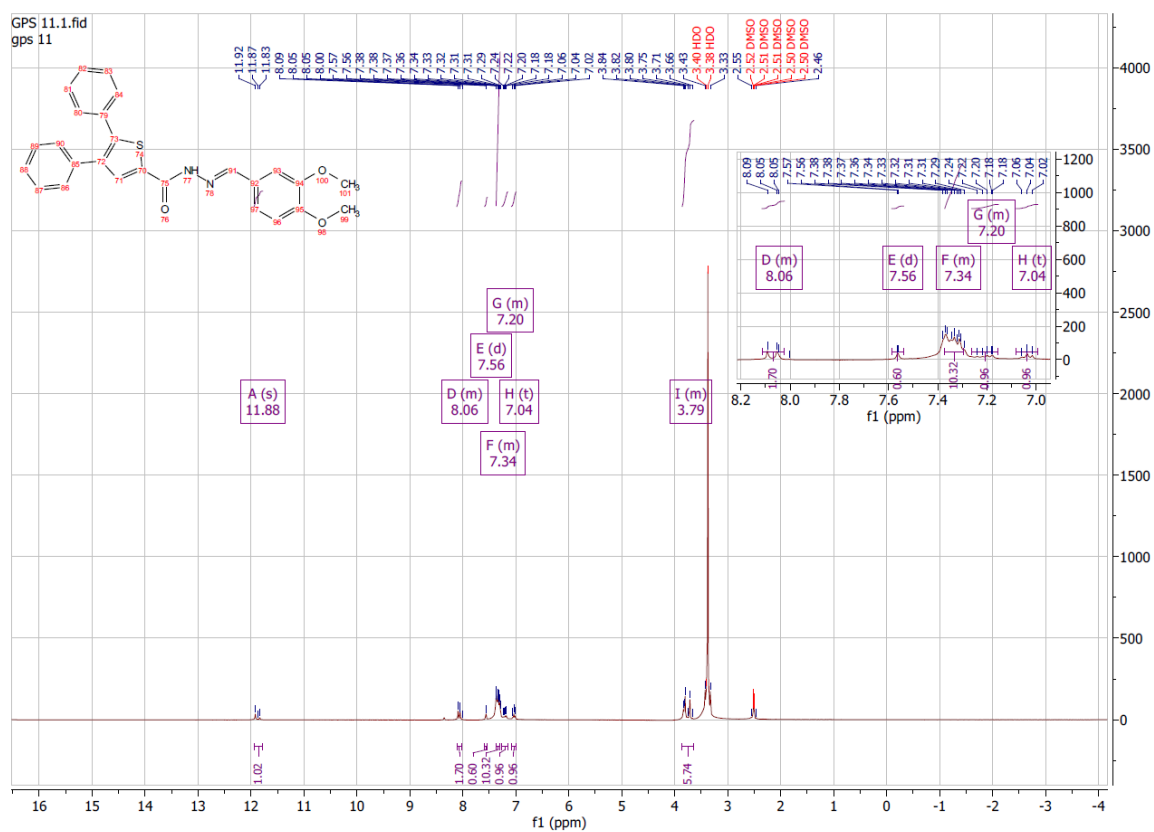

Figure S.13.  $^1\text{H}$ -NMR spectrum of compound 7g

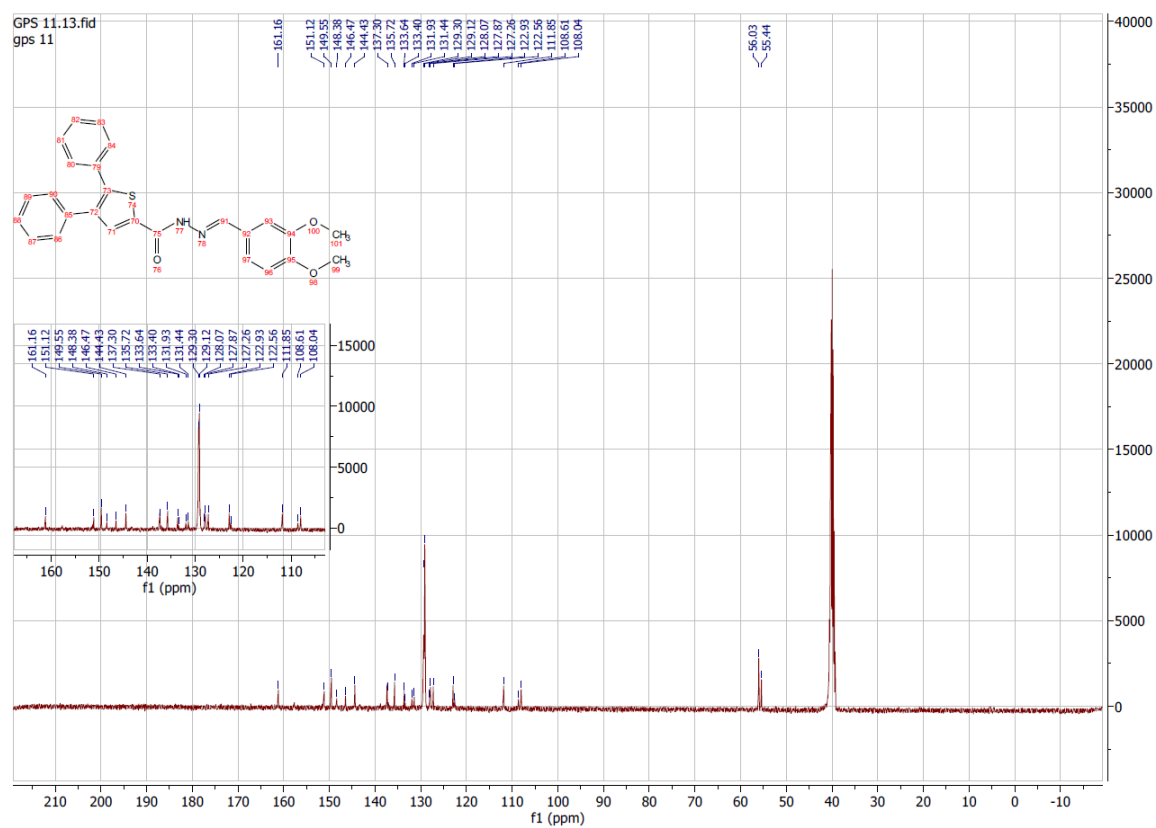

Figure S.14.  $^{13}\text{C}$ -NMR spectrum of compound 7g



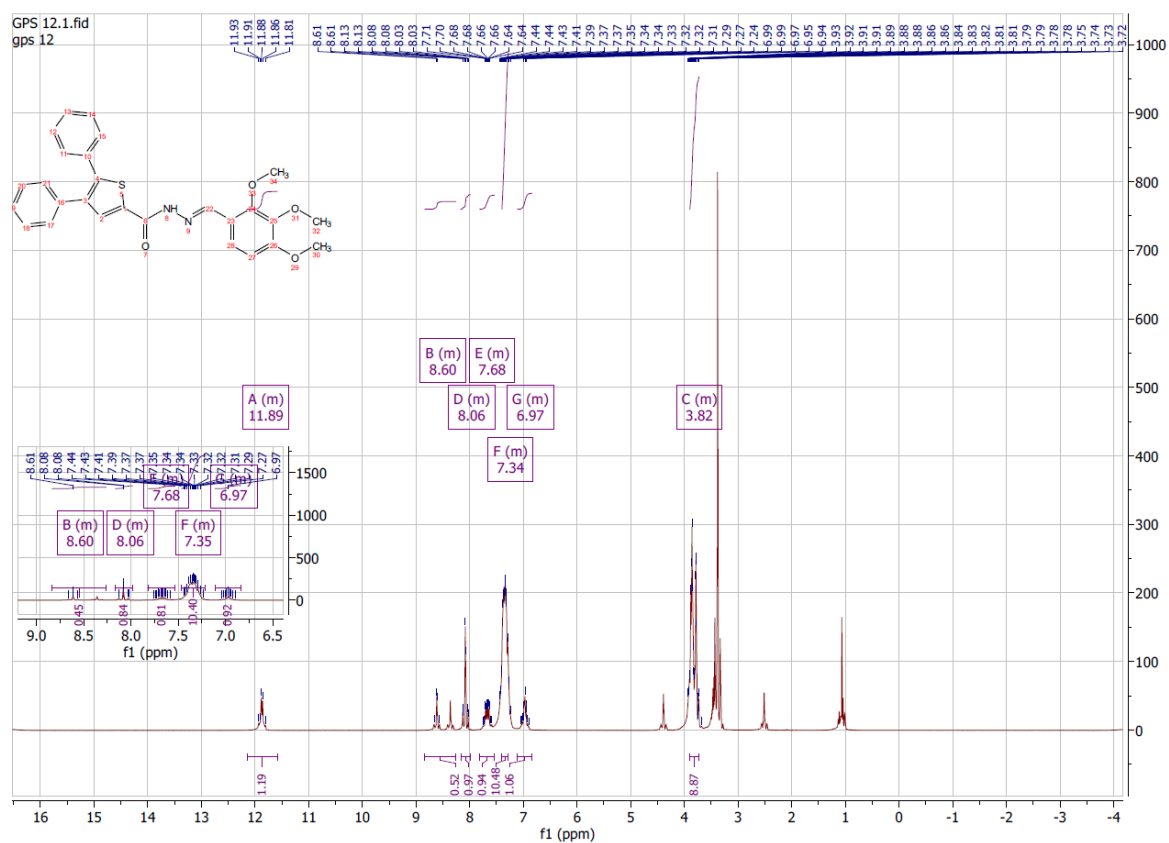

Figure S.15.- $^1\text{H}$ -NMR spectrum of compound 7h

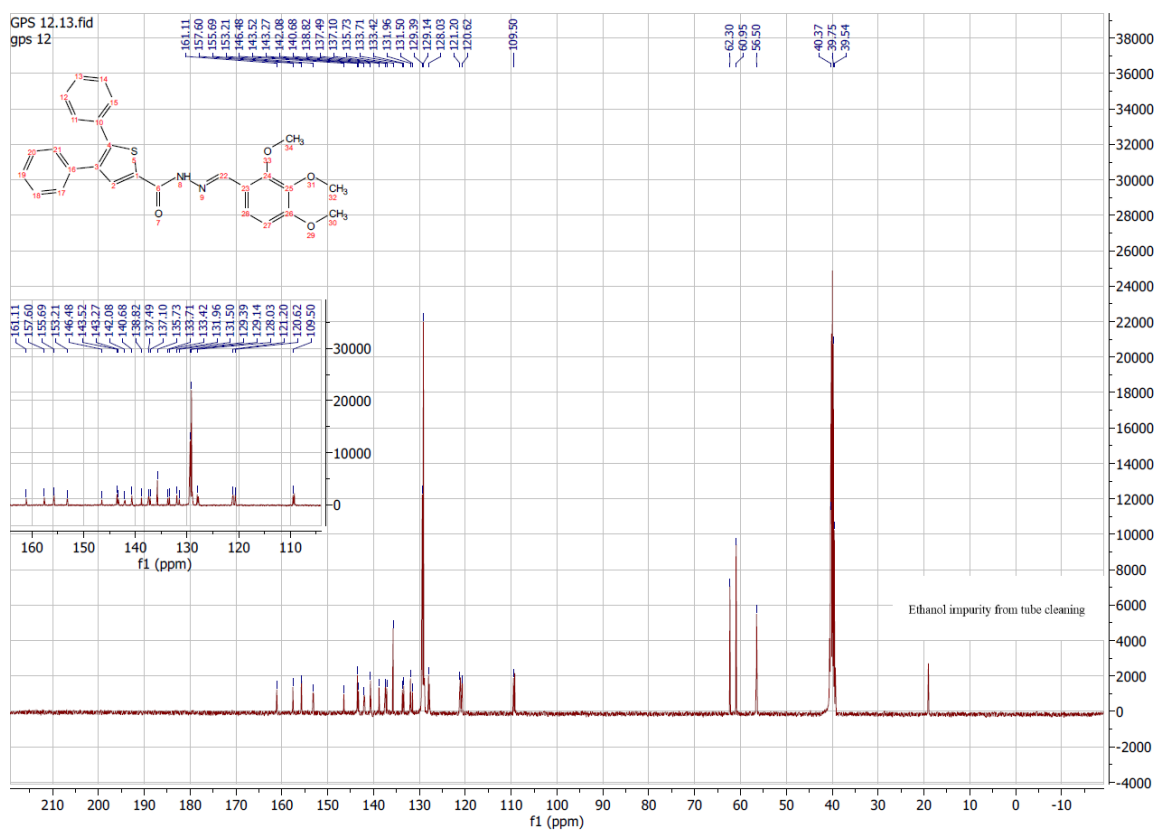

Figure S.16.  $^{13}\text{C}$ -NMR spectrum of compound 7h

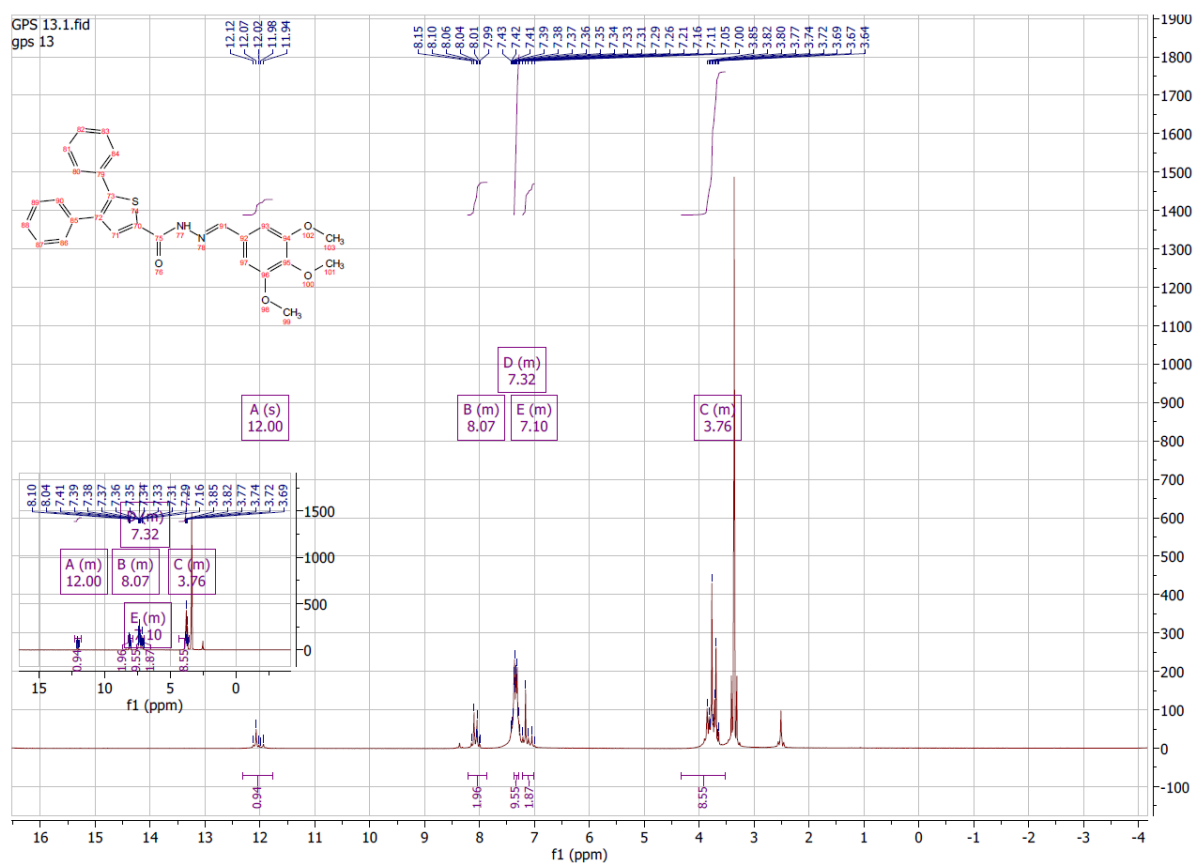

Figure S.17.  $^1\text{H}$ -NMR spectrum of compound 7i

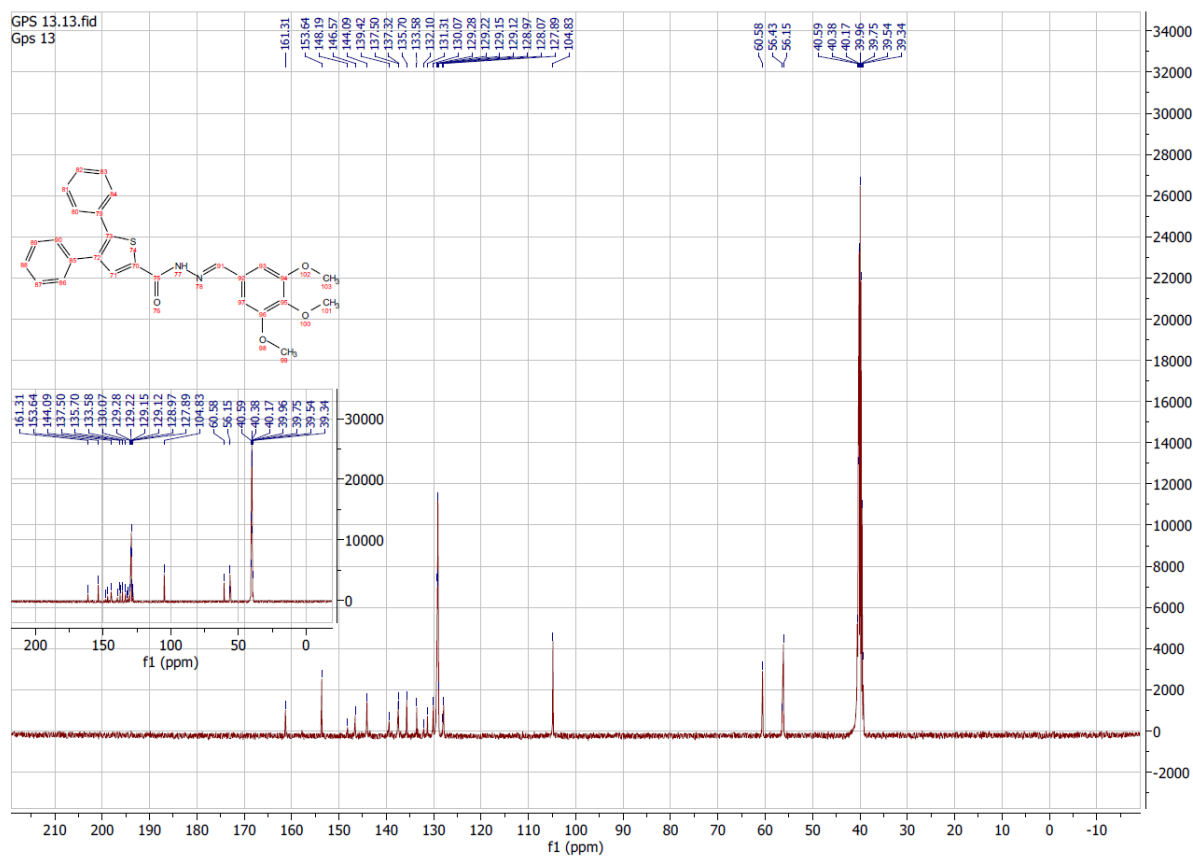

Figure S.18.  $^{13}\text{C}$ -NMR spectrum of compound 7i

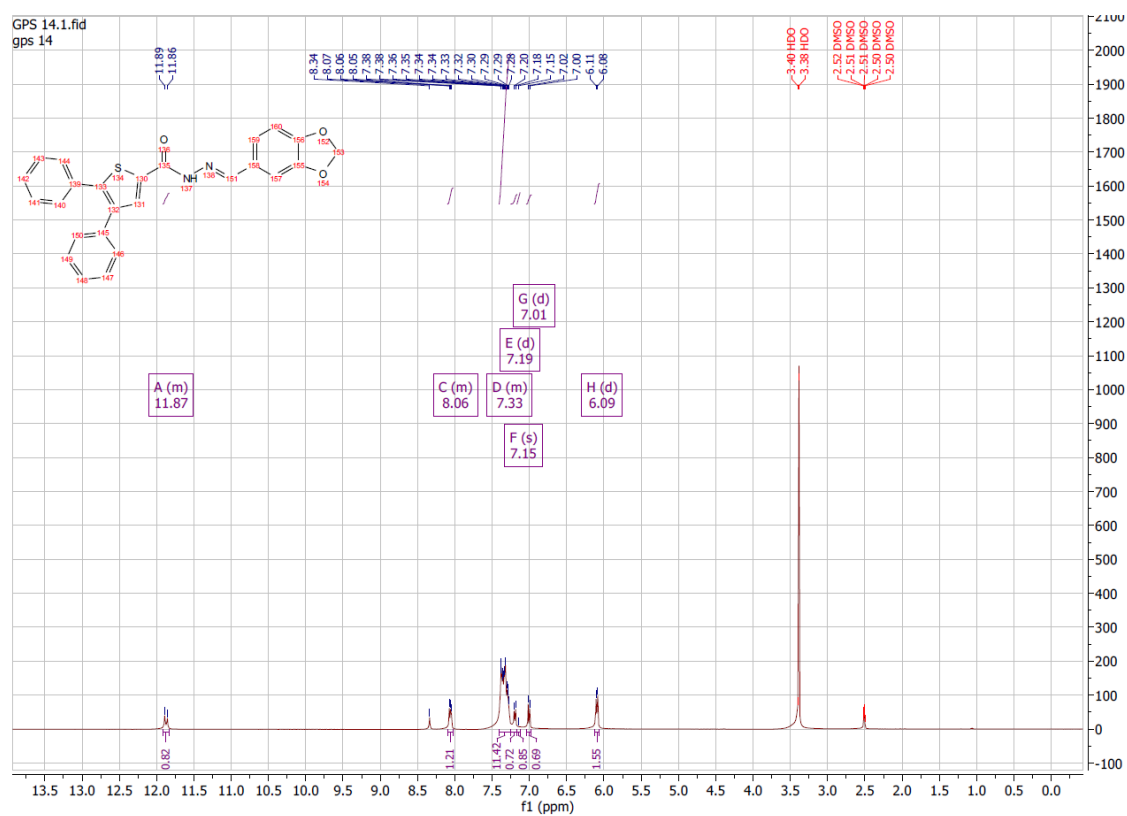

Figure S.19.  $^1\text{H}$ -NMR spectrum of compound 7j

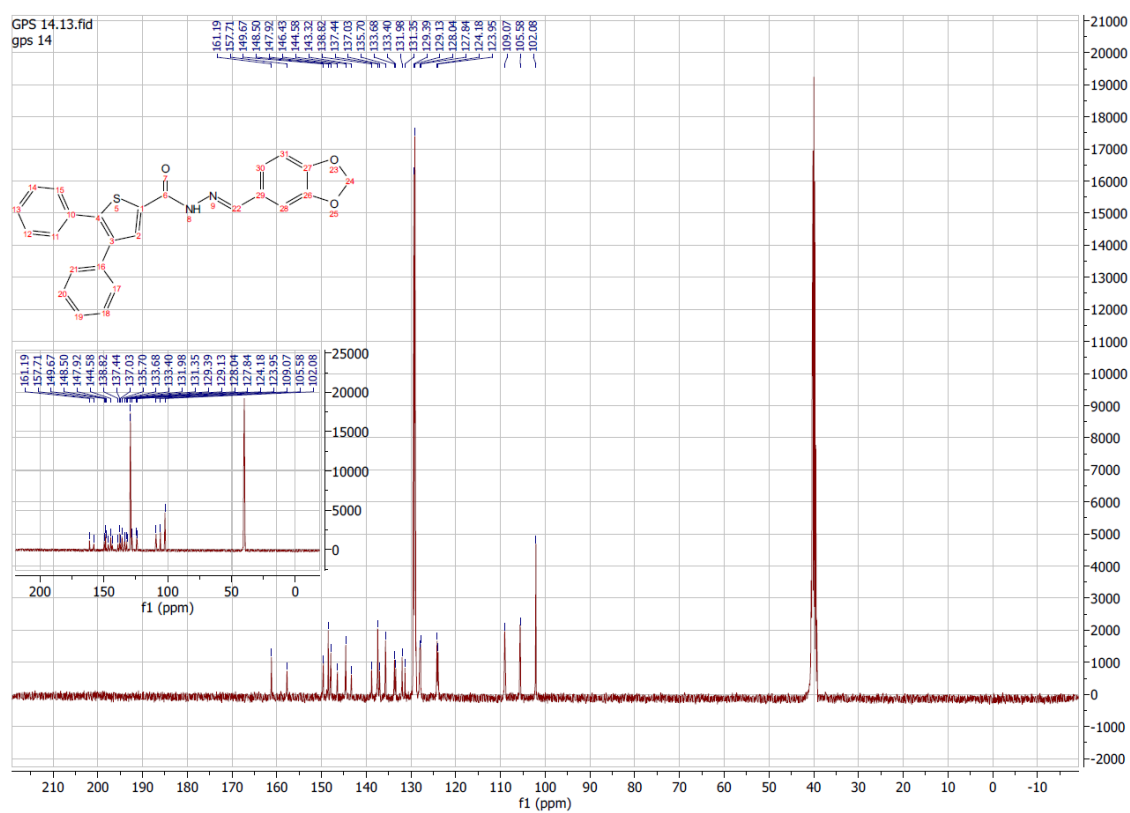

Figure S.20.  $^{13}\text{C}$ -NMR spectrum of compound 7j

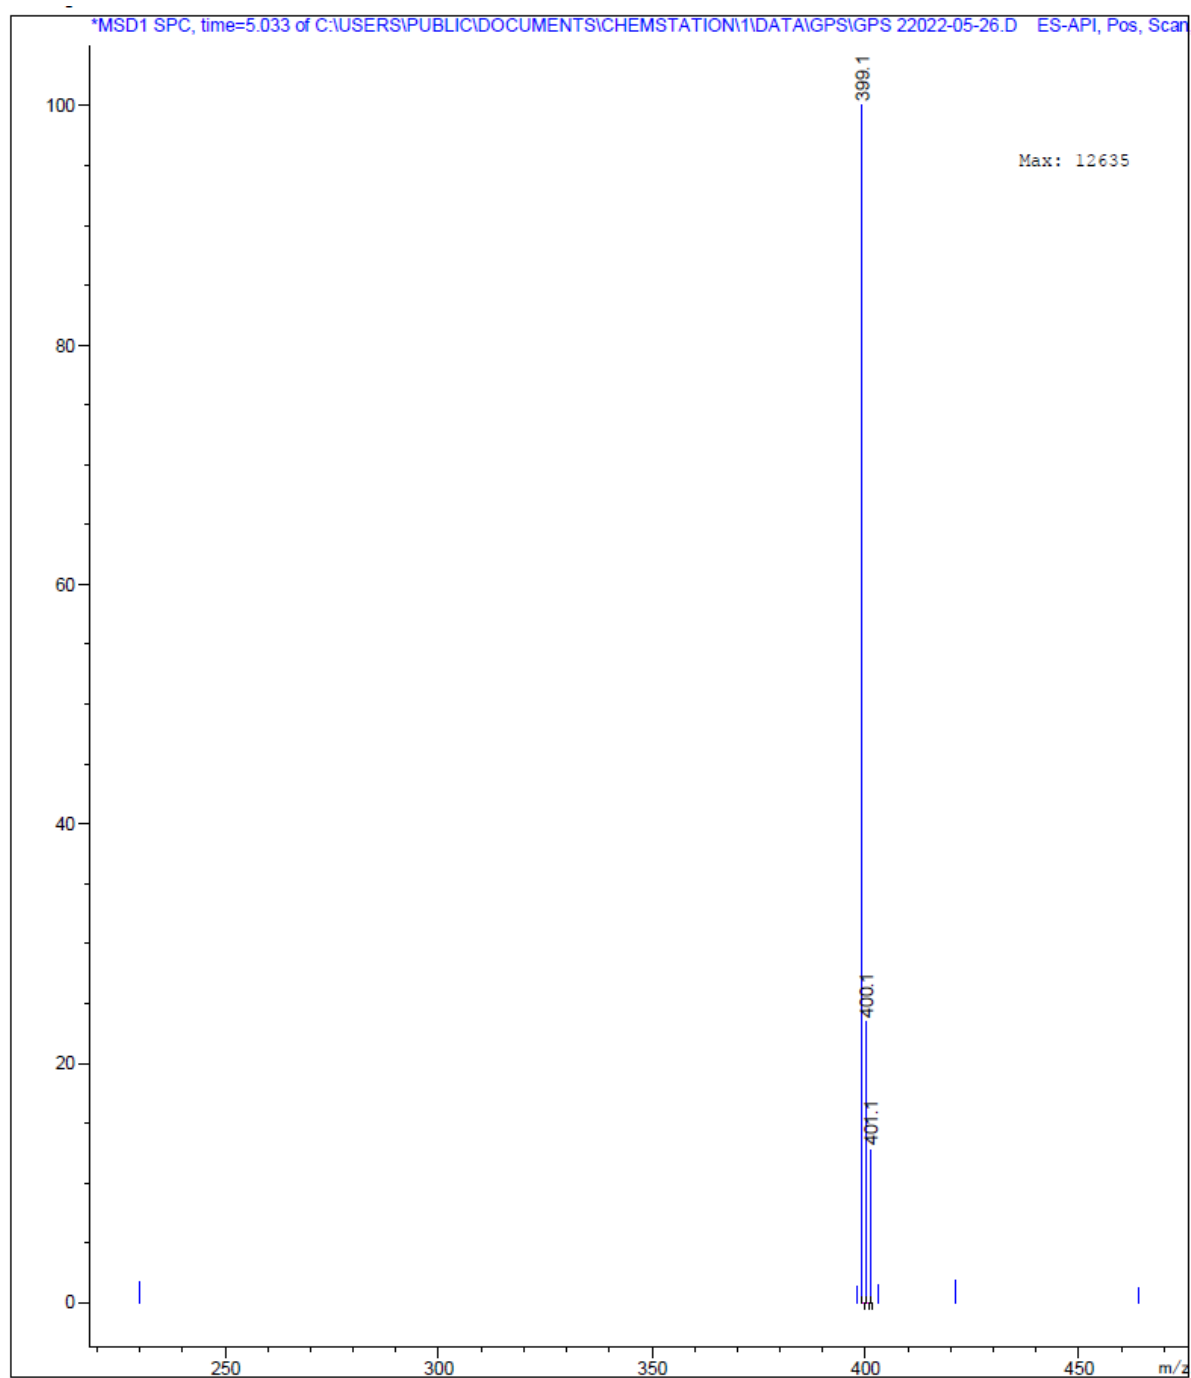

Figure S.21. LC-MS spectrum of compound 7a

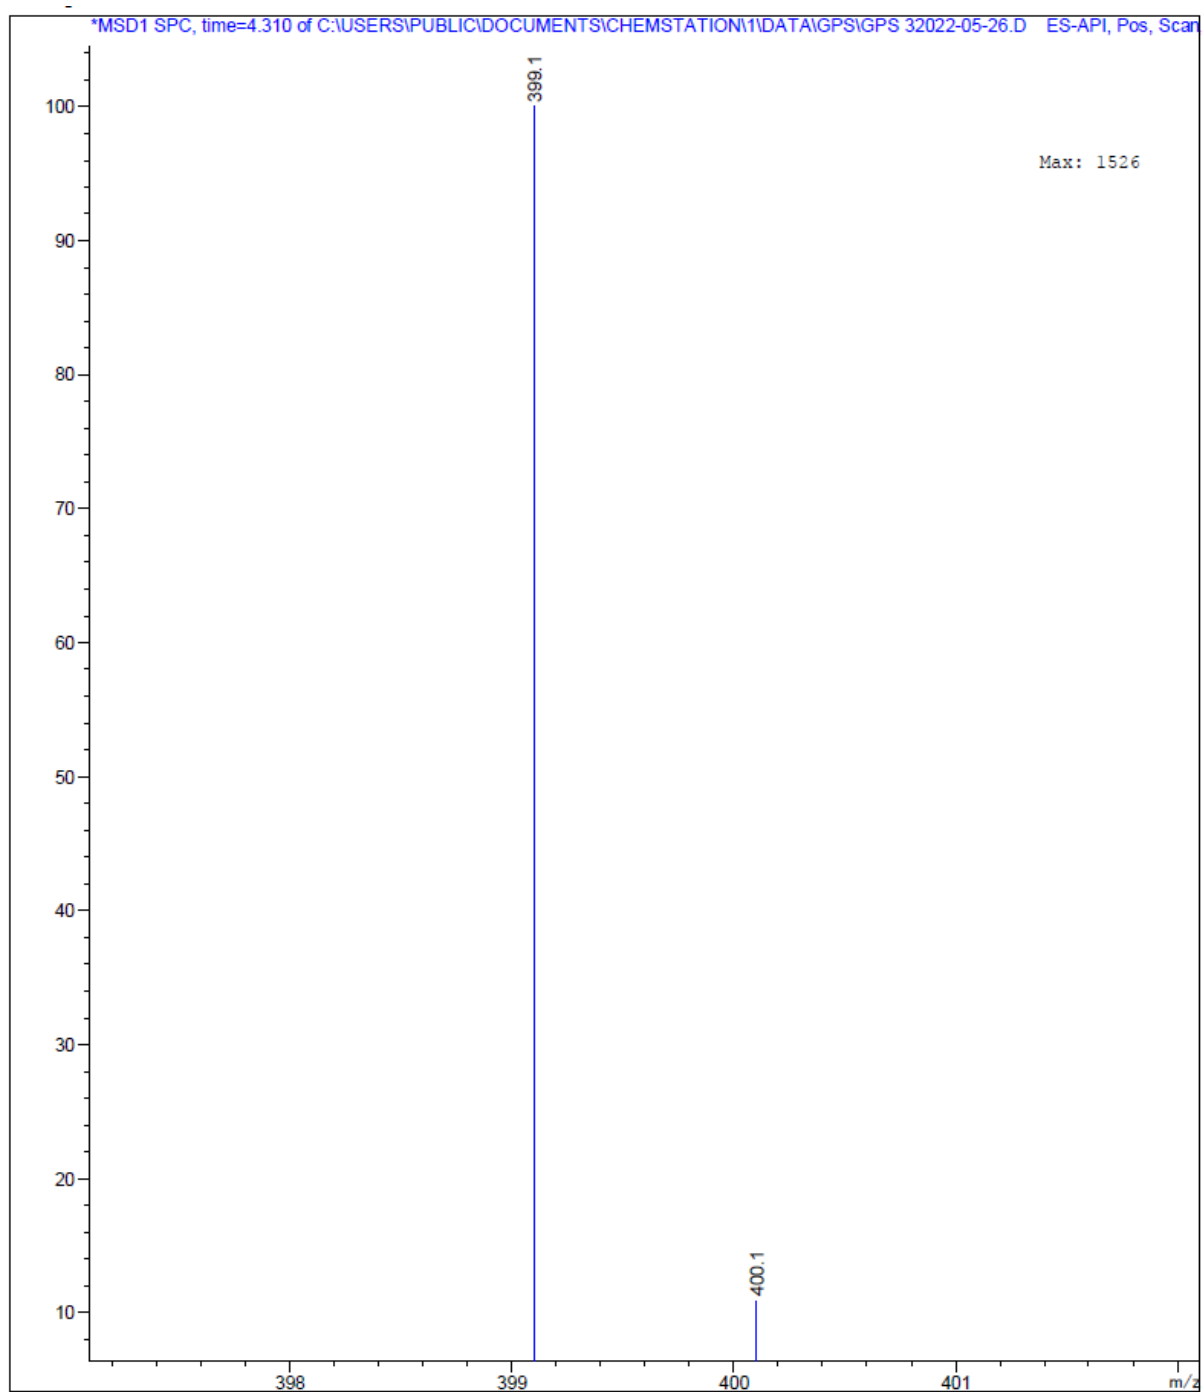

Figure S.22. LC-MS spectrum of compound 7b

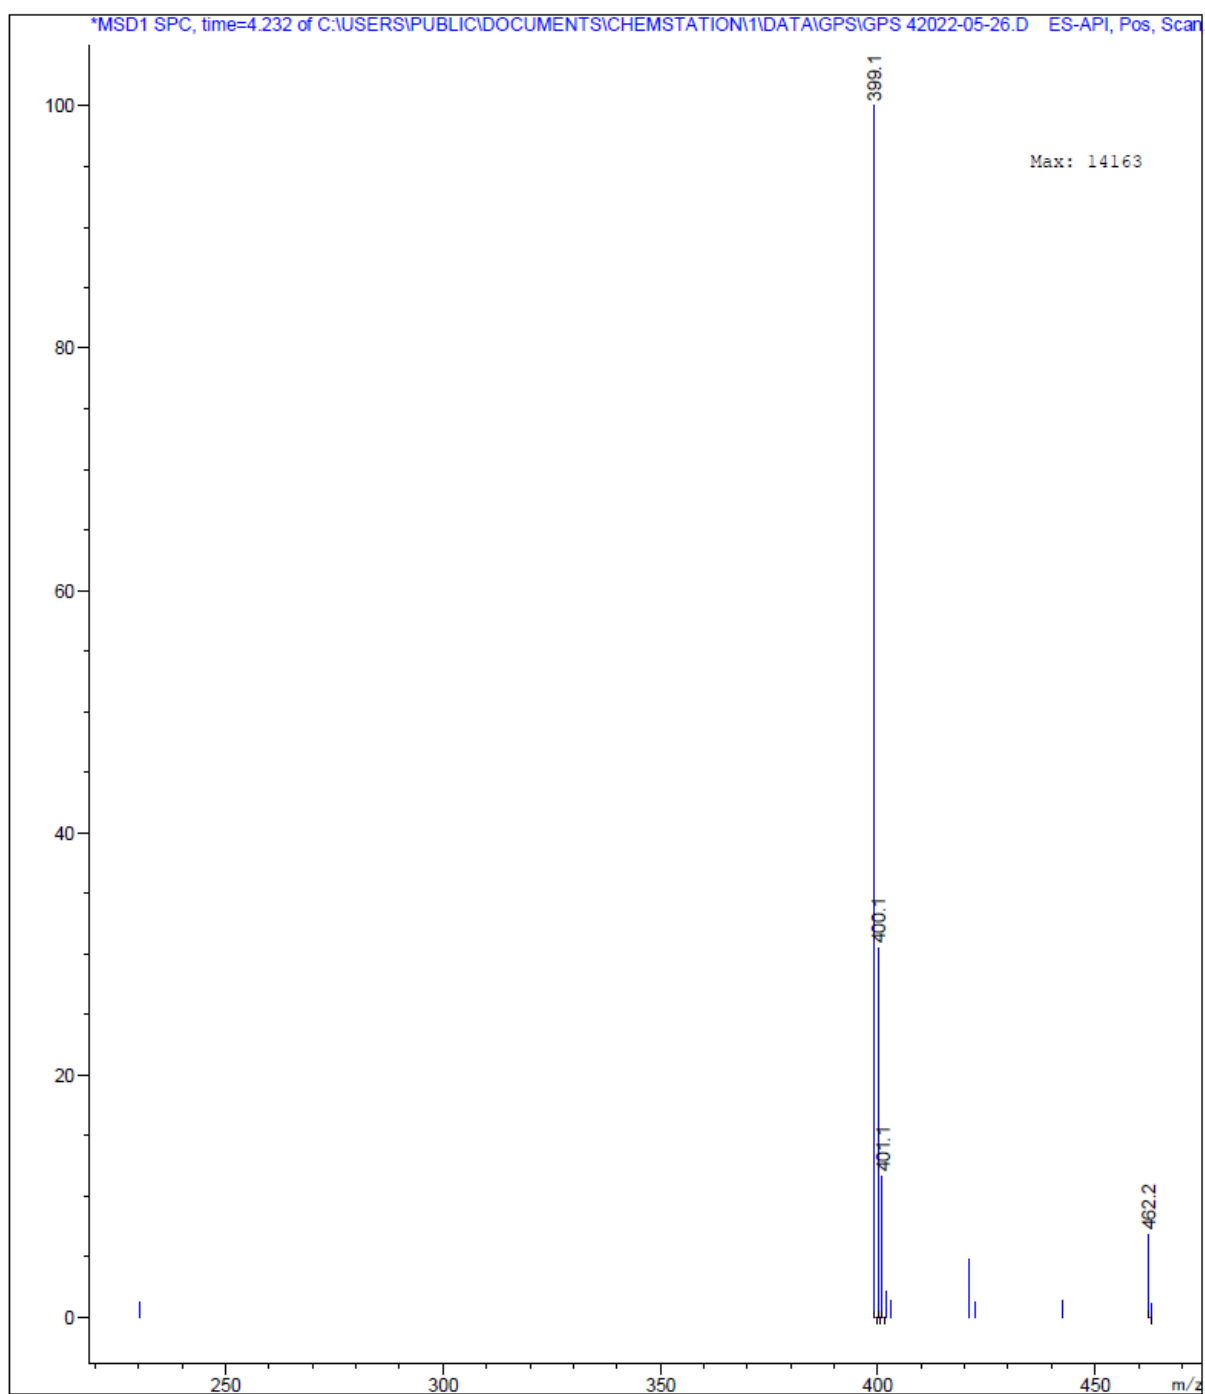

Figure S.23. LC-MS spectrum of compound 7c

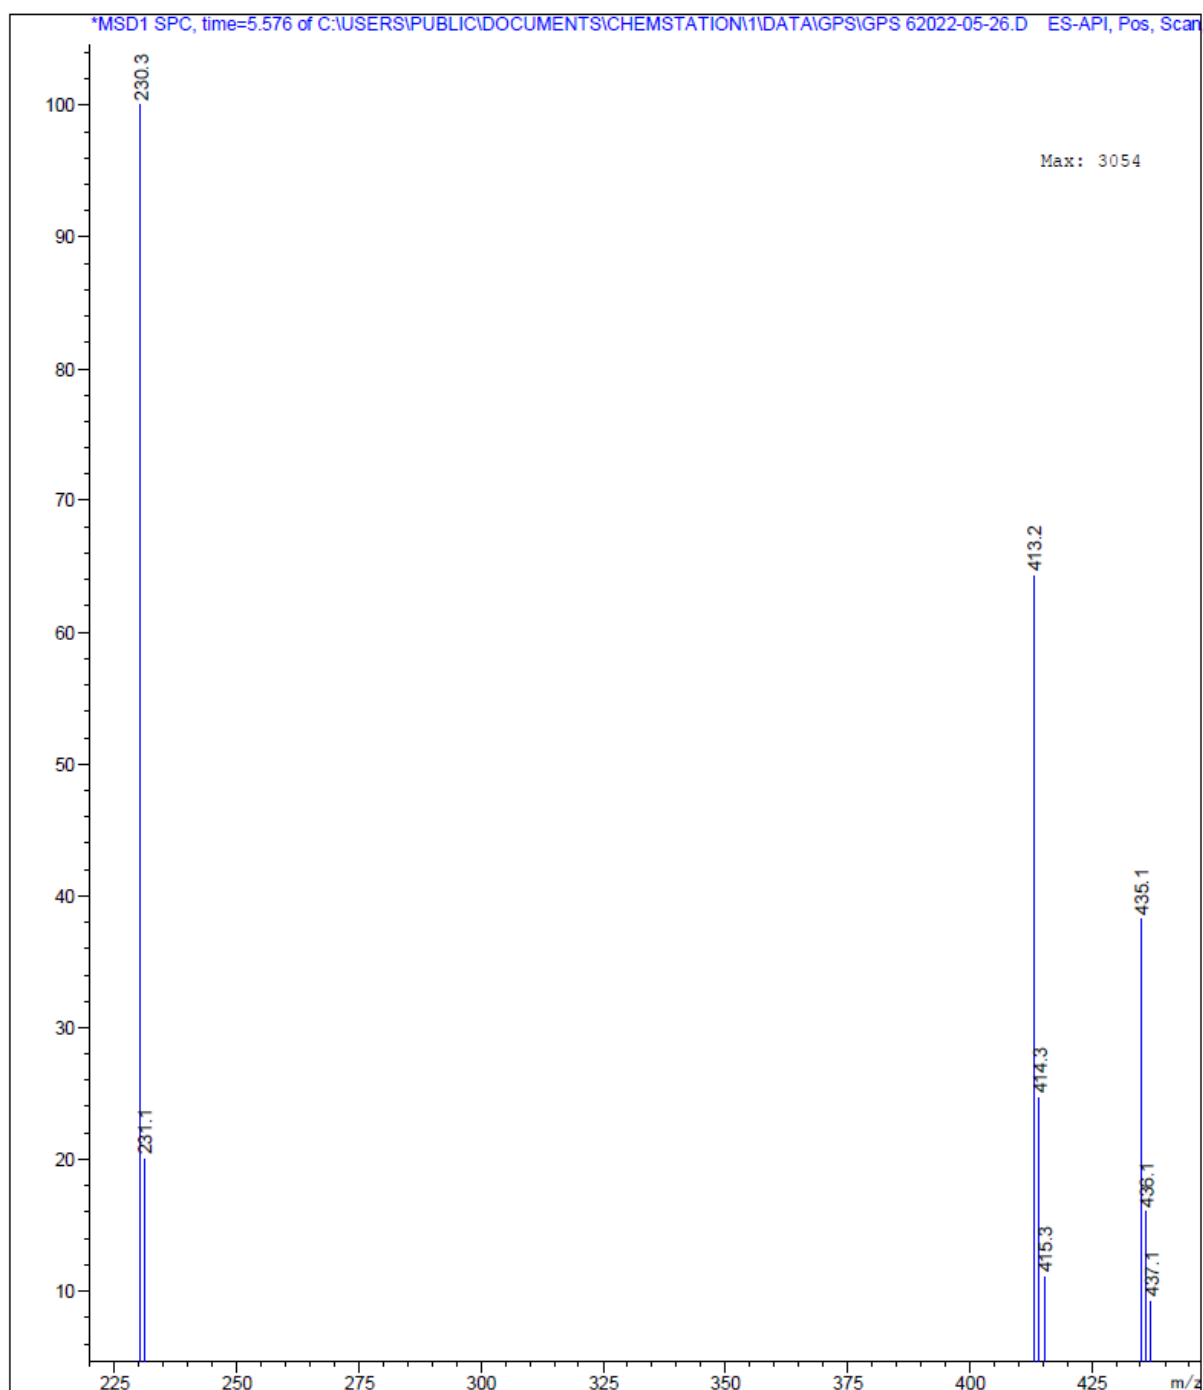

Figure S.24. LC-MS spectrum of compound 7d

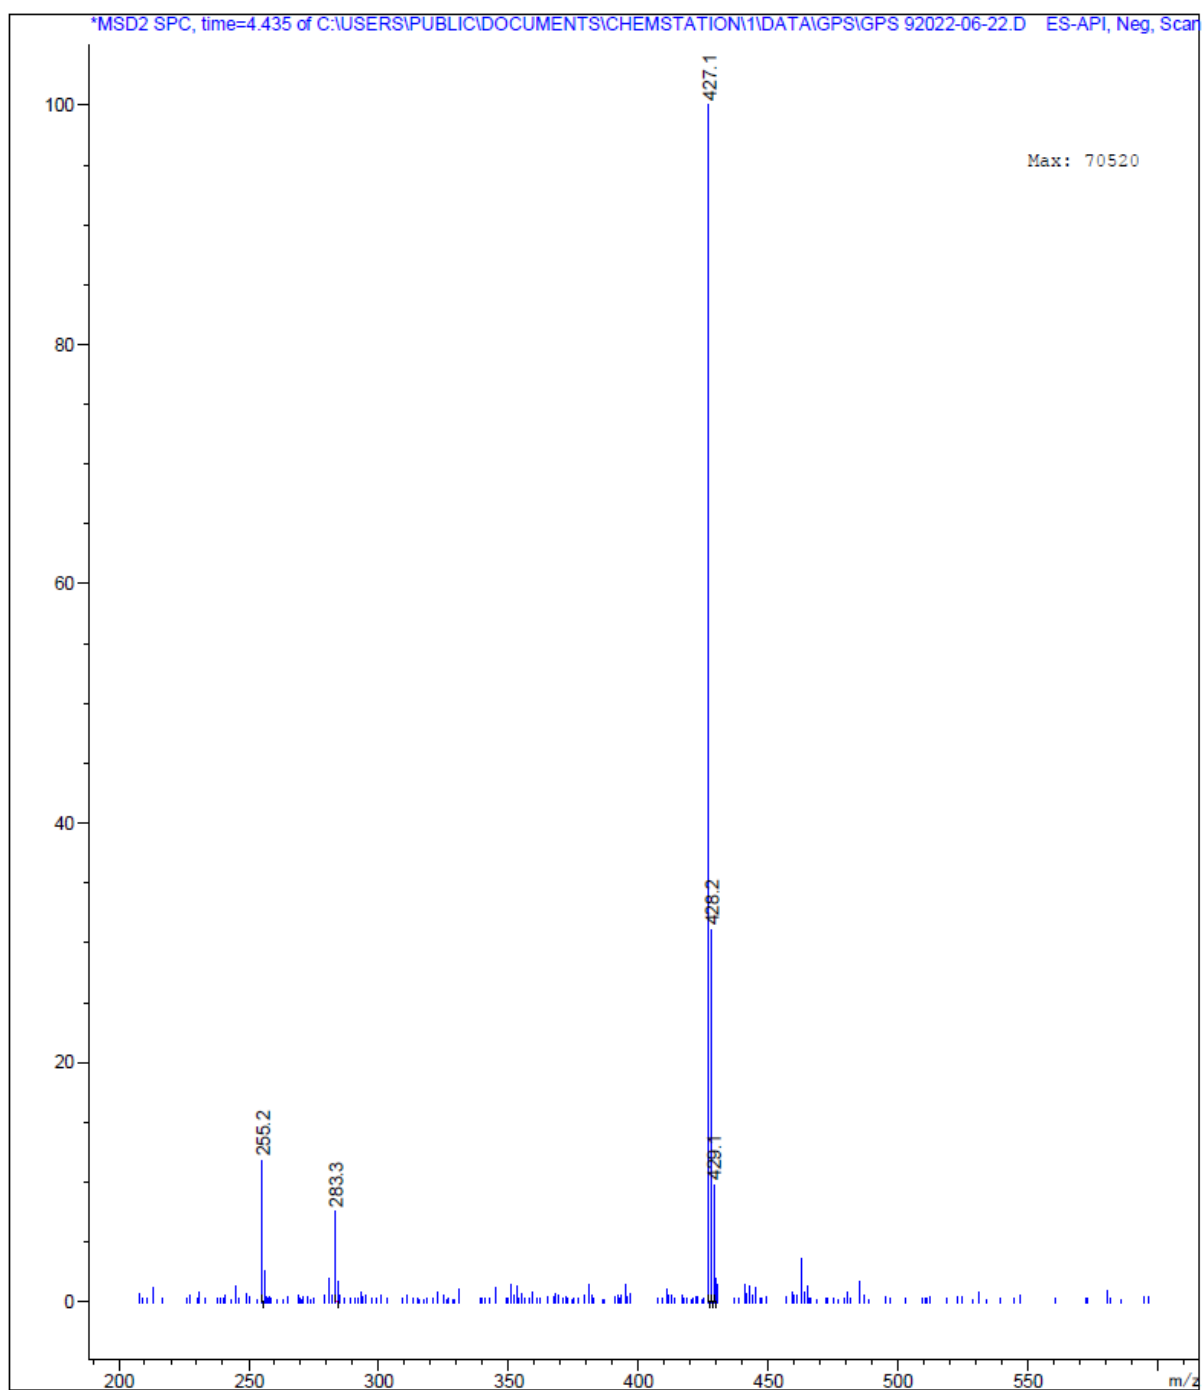

Figure S.25. LC-MS spectrum of compound 7e



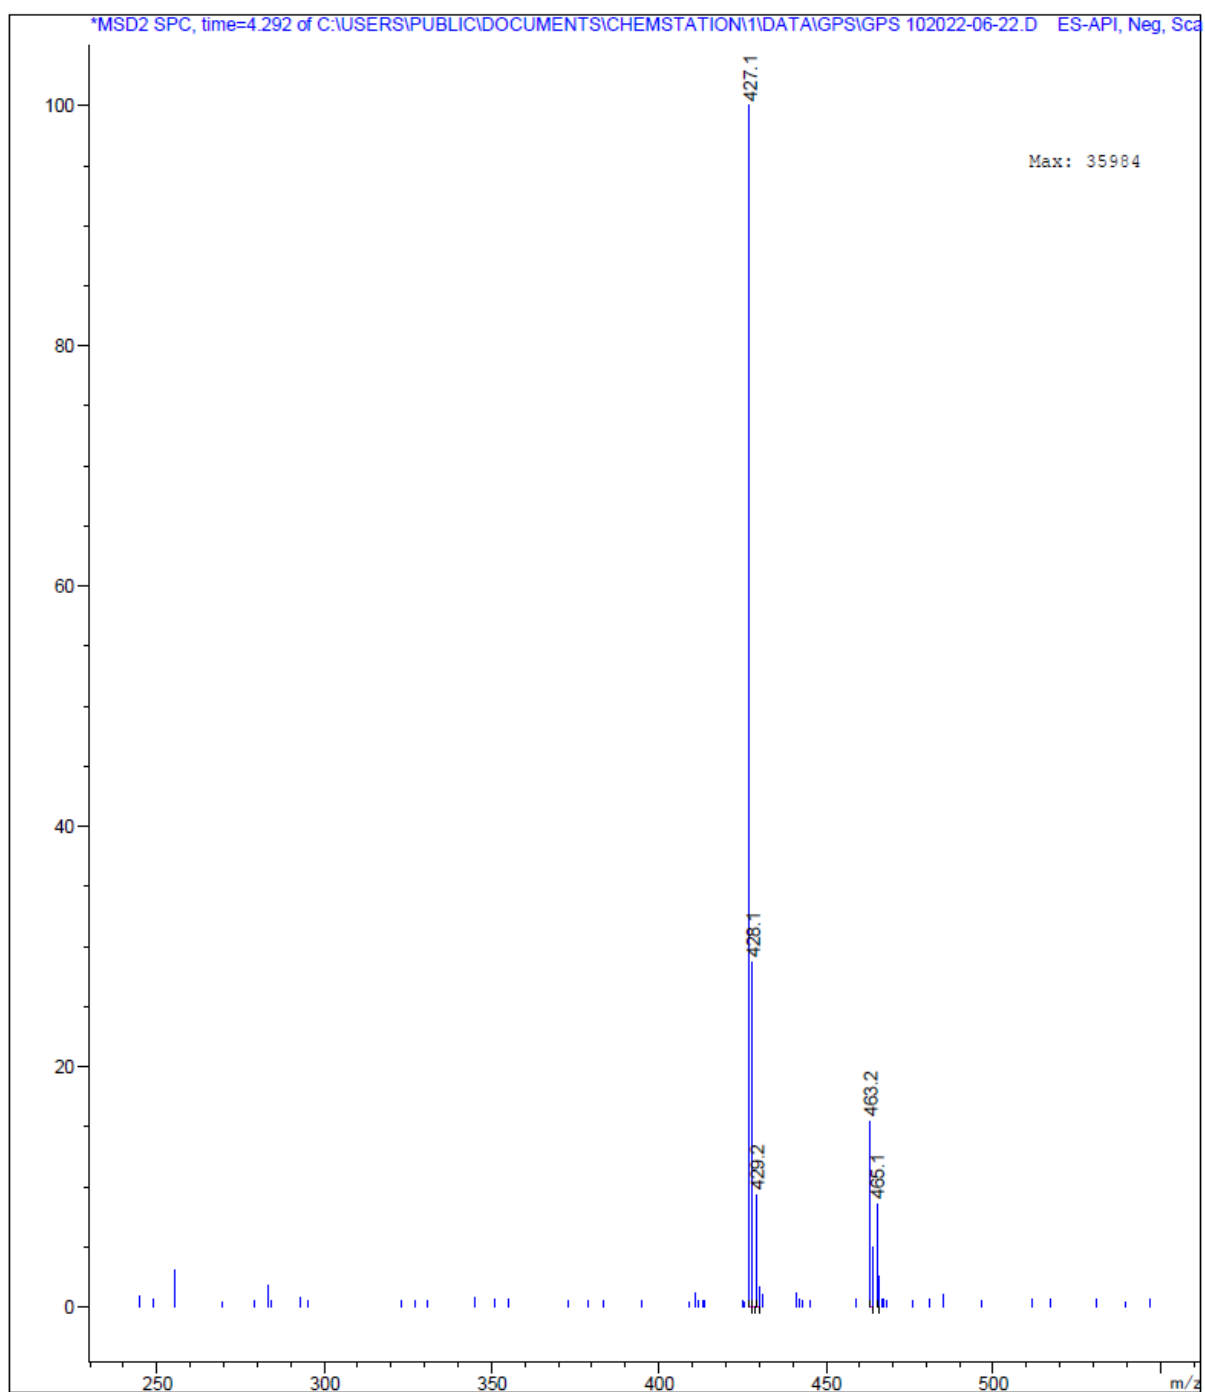

Figure S.26. LC-MS spectrum of compound 7f

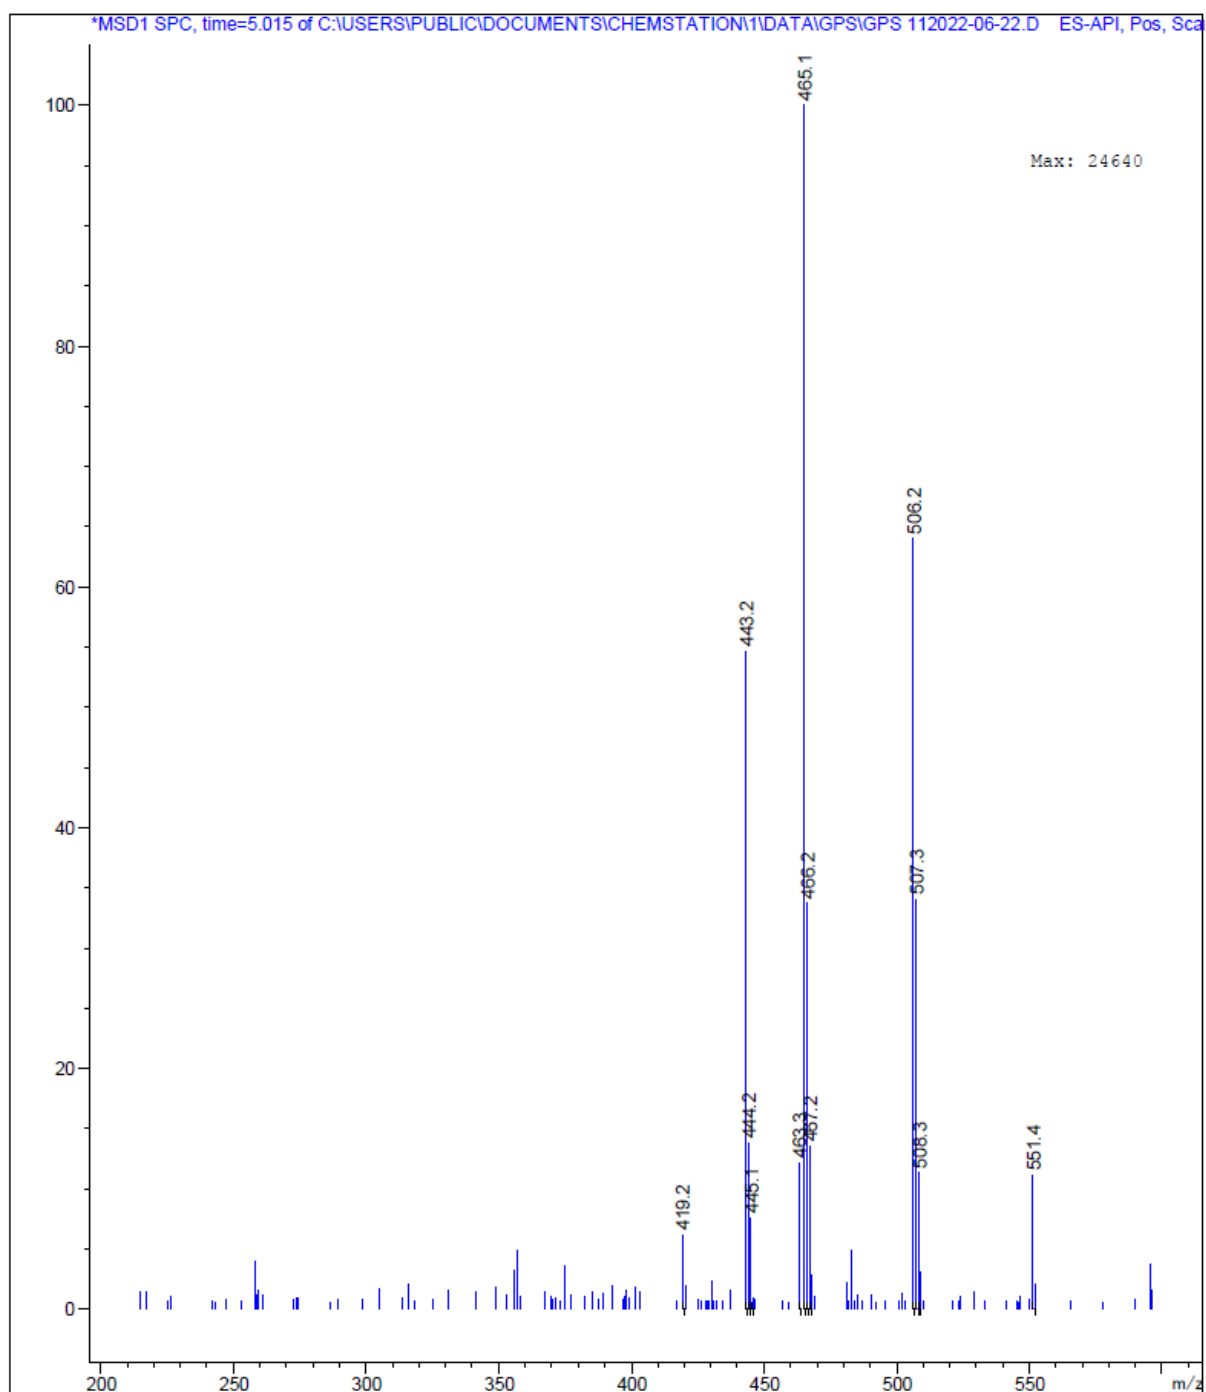

Figure S.27. LC-MS spectrum of compound 7g

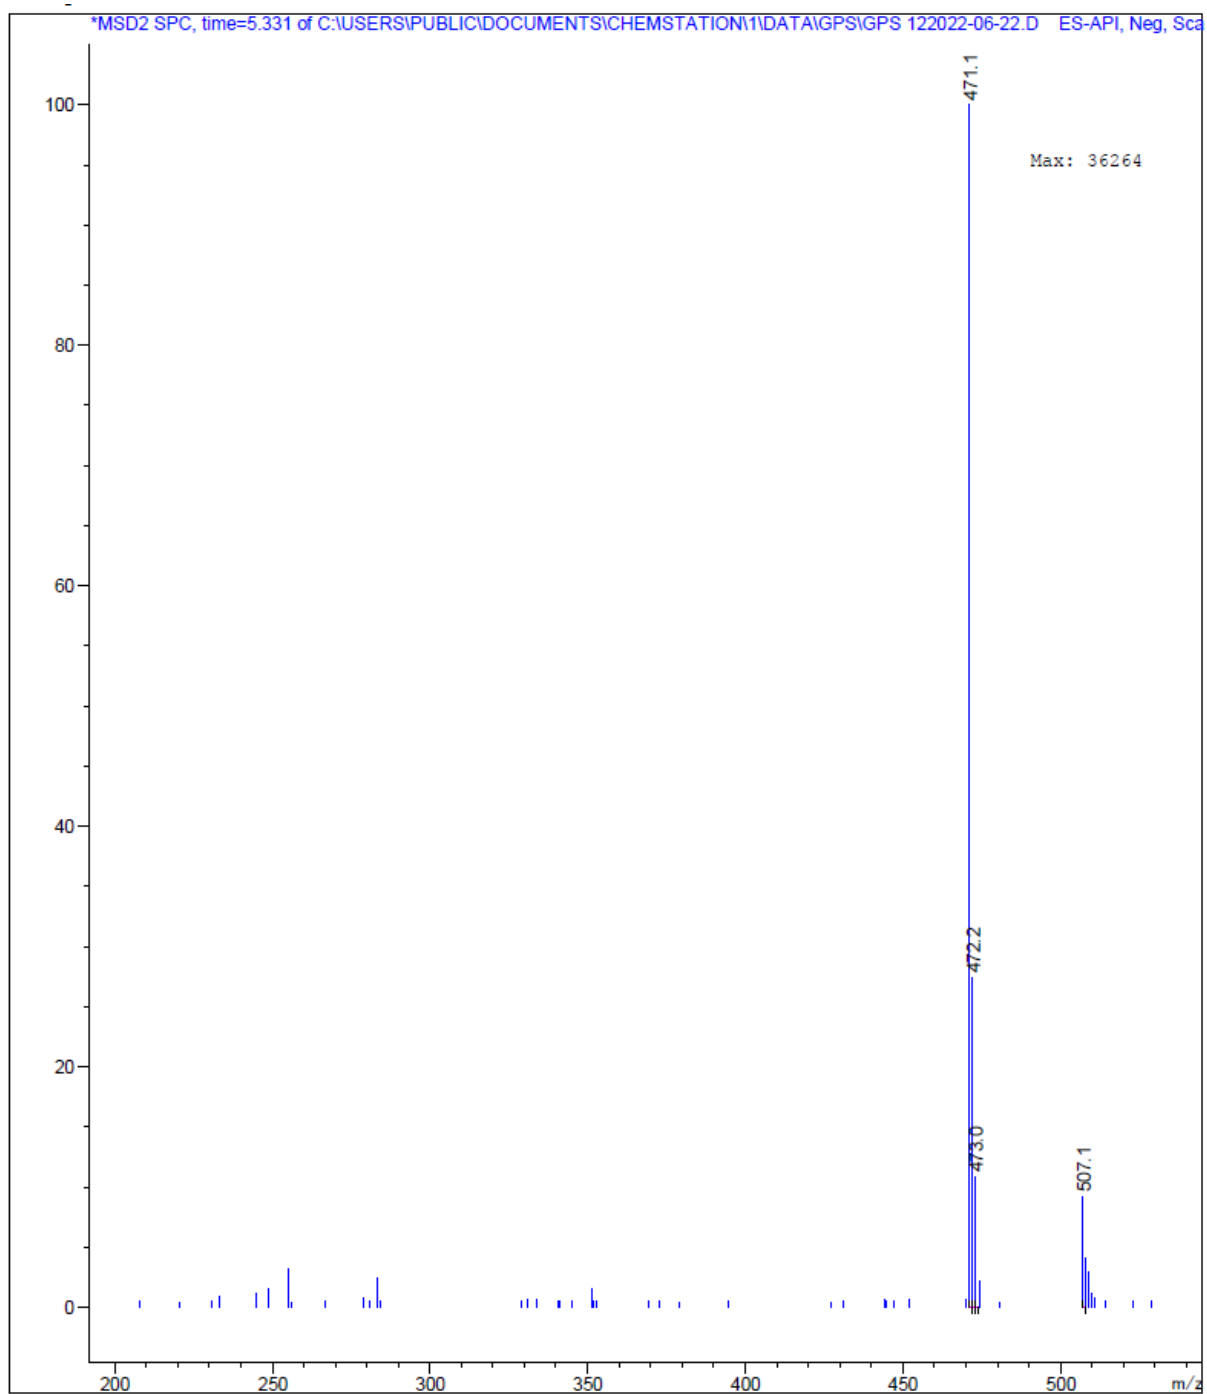

Figure S.28. LC-MS spectrum of compound 7h

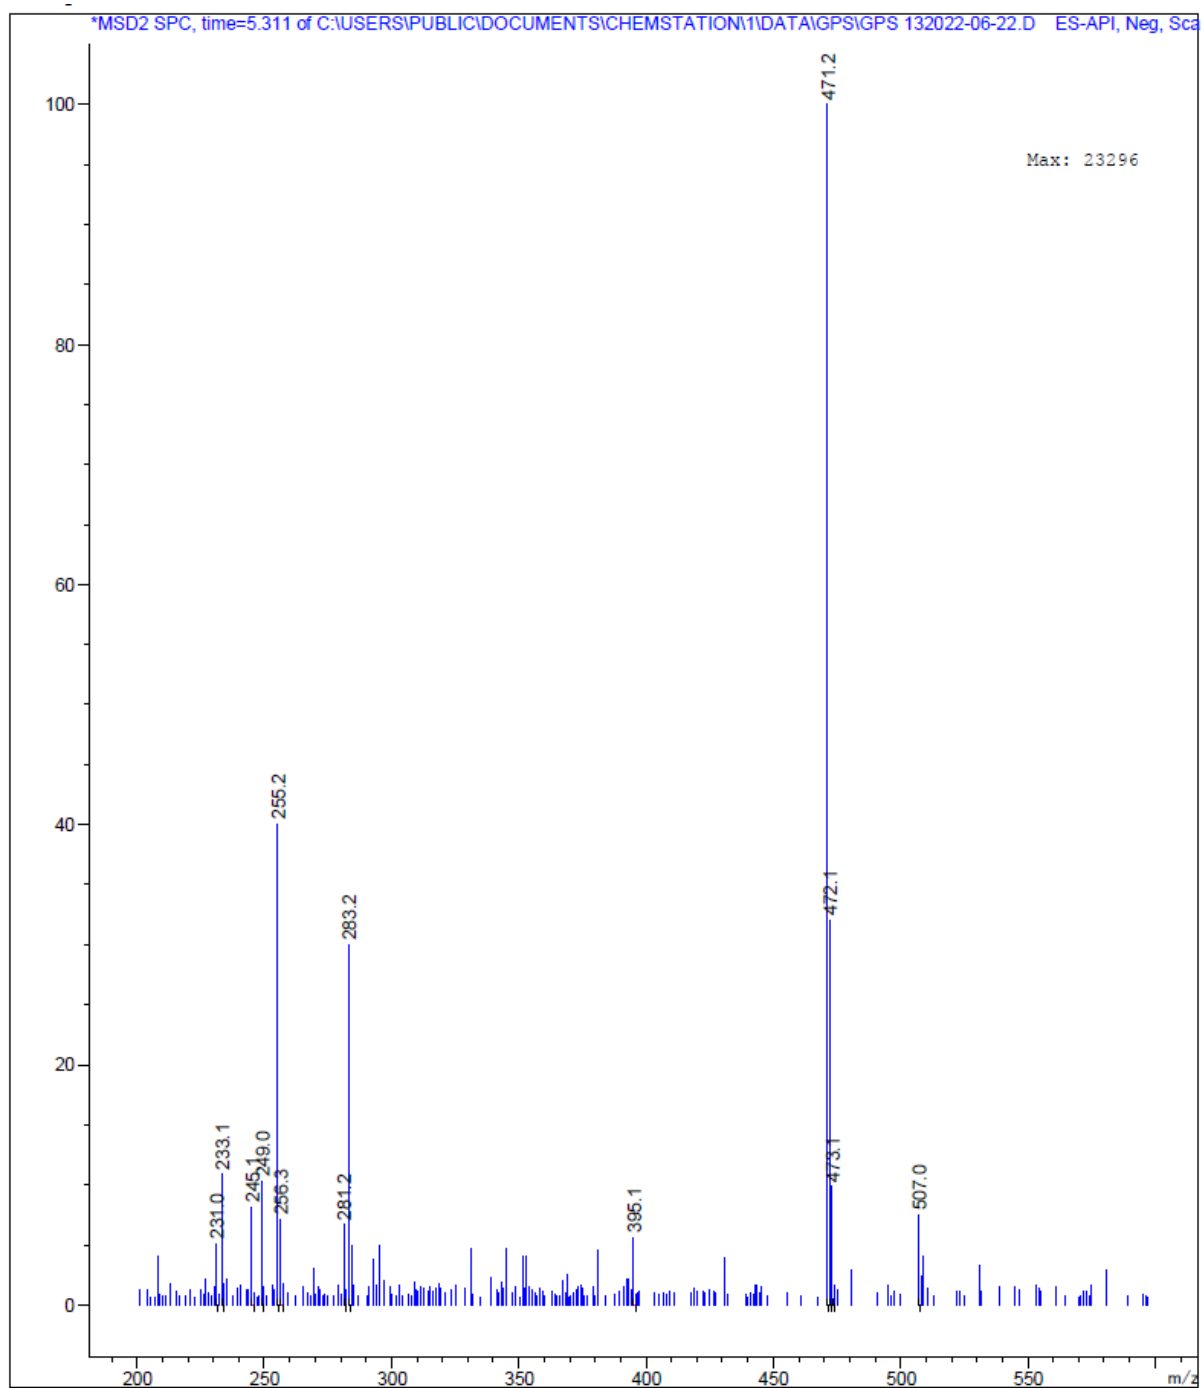

Figure S.29. LC-MS spectrum of compound 7i

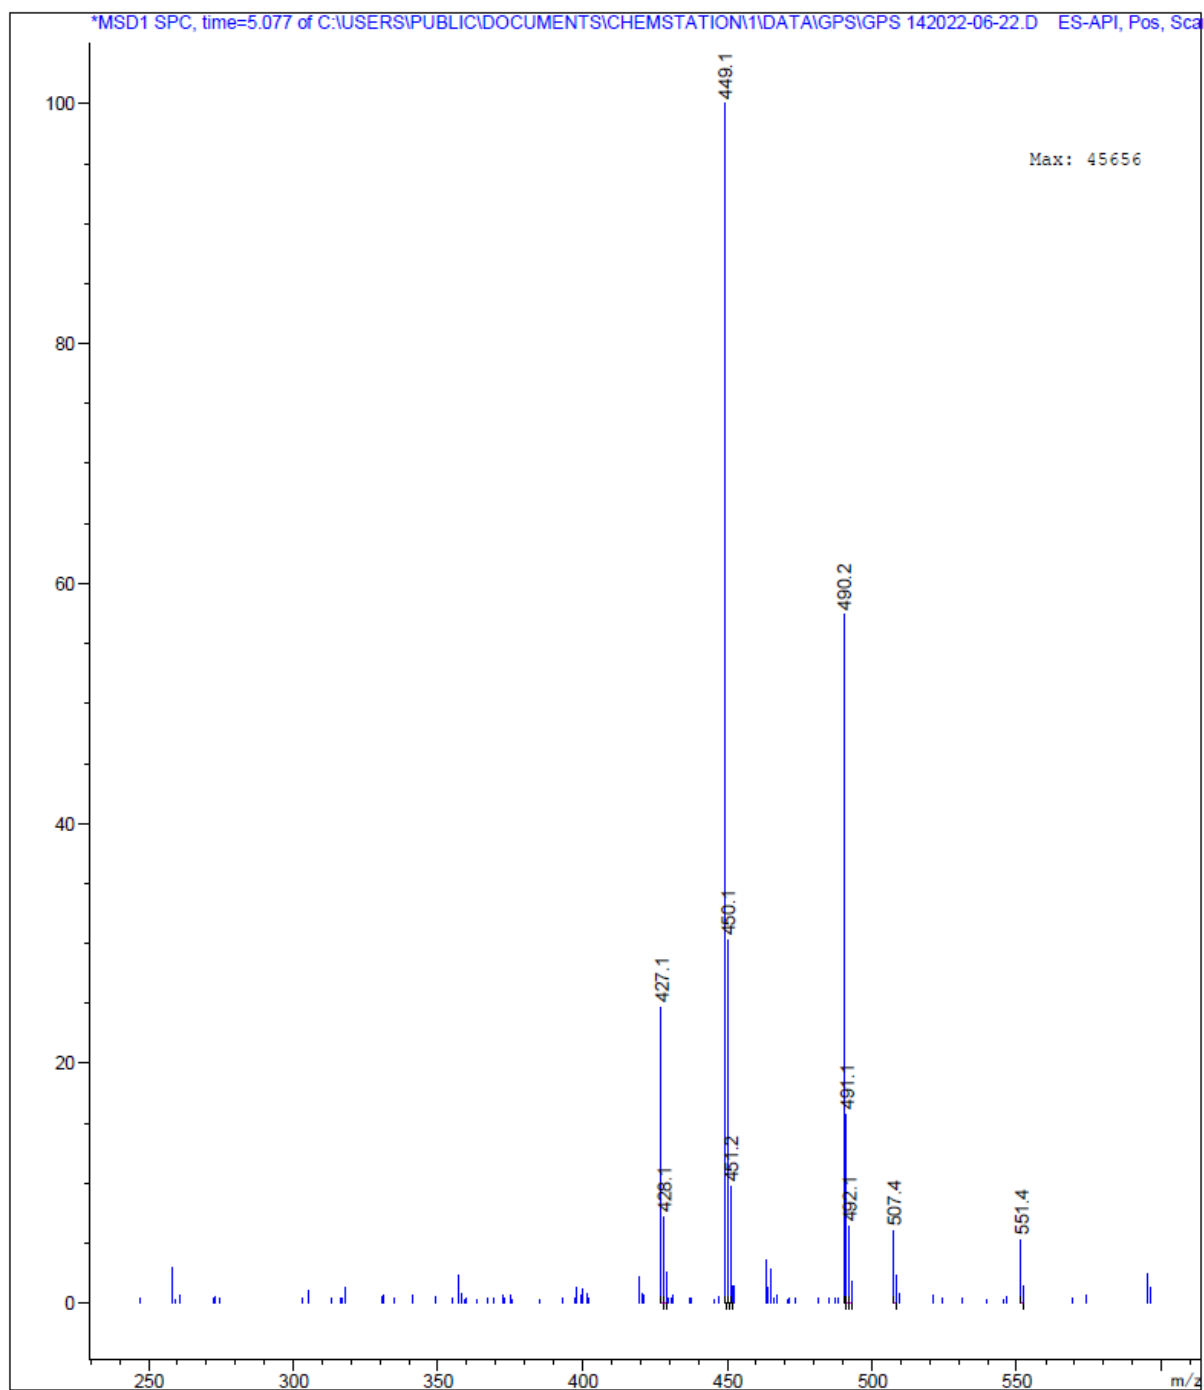

Figure S.30. LC-MS spectrum of compound 7j
